# Supplementary material for: Transcriptome analysis of PDGFRα+ cells identifies T-type Ca2+ channel CACNA1G as a new pathological marker for PDGFRα+ cell hyperplasia
Source: PLoS One. 2017 Aug 14;12(8):e0182265. doi: 10.1371/journal.pone.0182265 (PMC5555714; doi:10.1371/journal.pone.0182265)
Supplement: S3 Table — (XLSX) [file pone.0182265.s011.xlsx]

## Sheet: jejunum
S3 Table. List of genes expressed in jejunal and colonic PDGFRα+ cells.
Gene	Expression (FPKM)		Variant
ID	JPαC	CPαC	JPαC	CPαC
0610005C13Rik	0.186548	0.0384889	2	1
0610007C21Rik	58.8125	85.6515	1	1
0610007L01Rik	14.0432	21.3814	3	3
0610007P08Rik	2.44991	4.43819	3	4
0610007P14Rik	14.4075	18.3754	2	3
0610007P22Rik	9.64366	9.58067	3	3
0610009B14Rik	0	0.064883	0	1
0610009B22Rik	16.583	10.8068	3	2
0610009D07Rik	45.1261	32.9173	5	4
0610009L18Rik	17.2267	3.52853	1	1
0610009O20Rik	16.1552	21.8709	1	1
0610010B08Rik	1.87723	1.74003	4	3
0610010F05Rik	3.58451	3.61101	5	3
0610010K14Rik	20.7617	20.7361	6	6
0610010O12Rik	34.5424	20.7288	3	3
0610011F06Rik	19.798	10.3755	2	2
0610011L14Rik	9.78047	8.13361	5	4
0610012G03Rik	13.9898	11.4608	1	1
0610012H03Rik	0.104591	0.061161	1	1
0610030E20Rik	2.65648	6.66505	3	6
0610031J06Rik	50.4276	76.6981	1	1
0610037L13Rik	21.9479	37.4185	7	8
0610037P05Rik	22.0337	13.4865	3	3
0610038B21Rik	0.455342	0.330067	1	1
0610039K10Rik	0.0493123	0.124463	1	1
0610040B10Rik	1.30843	1.09452	2	3
0610040F04Rik	0.0329574	0.0873426	1	1
0610040J01Rik	1.65116	0	1	0
0610043K17Rik	0.130122	0.526883	2	3
0910001L09Rik	49.0244	33.0149	3	3
1110001A16Rik	5.86081	3.33868	2	2
1110001J03Rik	50.7459	30.7126	1	1
1110002B05Rik	50.3282	46.6363	1	1
1110002L01Rik	1.80502	0.942004	2	2
1110002N22Rik	3.7064	2.85701	6	5
1110003E01Rik	85.3576	89.732	2	2
1110004E09Rik	11.3223	5.99837	1	1
1110004F10Rik	47.2896	39.3415	2	2
1110005A03Rik	14.7966	10.4713	1	1
1110006O24Rik	0.529352	0.59909	1	1
1110007C09Rik	31.0061	16.2345	6	5
1110008F13Rik	51.4219	35.8447	2	2
1110008J03Rik	4.93223	4.30913	2	2
1110008L16Rik	1.79079	1.45885	1	1
1110008P14Rik	22.905	16.6779	1	1
1110012D08Rik	11.2494	15.8725	1	1
1110012J17Rik	6.63782	1.14608	3	3
1110012L19Rik	10.8367	8.17021	2	2
1110014N23Rik	11.9747	14.5077	2	2
1110017D15Rik	0.744482	0.396716	2	3
1110017F19Rik	0.0866306	0.130046	1	1
1110018G07Rik	7.12725	8.62805	2	2
1110018J18Rik	20.299	25.1066	4	4
1110020A21Rik	0.247165	0.338461	1	1
1110020G09Rik	6.49068	7.00459	6	4
1110021J02Rik	6.60335	6.50308	5	5
1110021L09Rik	3.92189	6.57585	3	3
1110028C15Rik	4.0254	3.01519	5	4
1110031I02Rik	9.46584	8.92625	1	1
1110032A03Rik	7.03365	4.32736	2	2
1110032A04Rik	0.737978	0.0335144	3	1
1110032F04Rik	0.215374	0.333377	1	1
1110034A24Rik	1.1231	1.29937	1	1
1110034B05Rik	4.26607	3.52196	3	4
1110034G24Rik	7.80232	4.50215	4	4
1110037F02Rik	7.9412	9.62163	5	6
1110038B12Rik	6.94743	8.89848	5	5
1110038D17Rik	8.91119	7.07795	3	3
1110038F14Rik	20.3054	23.3095	3	3
1110046J04Rik	3.04171	2.23671	1	1
1110049F12Rik	22.3346	15.3755	2	3
1110051M20Rik	13.2228	7.74167	1	1
1110054M08Rik	4.05004	3.625	1	1
1110054O05Rik	3.51893	4.06818	3	3
1110057K04Rik	11.1201	9.23356	5	5
1110058L19Rik	20.248	11.4886	1	1
1110059E24Rik	15.7549	10.9611	2	2
1110059G10Rik	15.0525	10.5671	5	5
1110065P20Rik	24.7867	25.7634	1	1
1110067D22Rik	11.2595	16.3537	4	4
1190002F15Rik	0.924812	1.87717	1	1
1190002H23Rik	7.2589	11.8229	1	1
1190002N15Rik	4.735	4.1277	1	1
1190003J15Rik	0.455458	0	1	0
1190005F20Rik	8.90868	8.35425	4	3
1190005I06Rik	8.83988	1.57059	1	1
1190007F08Rik	15.0598	9.15788	2	2
1190007I07Rik	11.6094	4.24219	5	5
1200009I06Rik	3.67891	13.7921	8	10
1200011I18Rik	3.12596	5.0011	1	1
1200011M11Rik	3.39536	3.64878	1	1
1200014J11Rik	3.95701	6.10208	2	2
1200016B10Rik	2.89157	3.86669	3	4
1300001I01Rik	16.7092	13.4385	4	4
1300002E11Rik	3.79779	5.98145	2	2
1300002K09Rik	0.0929111	0.0340364	2	1
1300010F03Rik	8.74166	12.8468	3	4
1300014I06Rik	18.7294	21.7413	6	9
1300017J02Rik	0	0.0427781	0	1
1300018I17Rik	7.89843	9.37805	3	3
1300018J18Rik	9.45713	10.9252	2	2
1500001M20Rik	3.5124	4.00192	2	2
1500002O20Rik	8.11658	13.8218	2	2
1500003O03Rik	47.3157	46.2935	1	1
1500004A13Rik	0.888771	1.49017	1	1
1500009C09Rik	0.829733	0	1	0
1500009L16Rik	2.39364	1.17337	2	2
1500010J02Rik	5.59106	5.83473	6	6
1500011B03Rik	8.56061	4.69633	2	2
1500011H22Rik	3.56332	3.95589	2	2
1500011K16Rik	34.4551	9.49782	1	1
1500012F01Rik	18.697	21.4901	1	1
1500015A07Rik	0.623328	0.97215	1	1
1500015O10Rik	0.604453	0.204828	1	1
1500017E21Rik	0.769068	0.0530261	3	1
1500031L02Rik	8.06428	4.09616	1	1
1500032L24Rik	140.549	117.827	2	2
1520402A15Rik	0.637895	0.498089	1	1
1600002H07Rik	3.43487	5.42726	4	6
1600010M07Rik	0.276049	0.0592149	1	1
1600012F09Rik	2.72863	2.26111	1	1
1600012H06Rik	9.35413	9.16185	3	3
1600014C10Rik	9.62192	8.71991	4	4
1600014C23Rik	0.0338903	0	1	0
1600016N20Rik	0.0481945	0.0287307	1	1
1600020E01Rik	6.43221	9.30898	2	2
1600021P15Rik	5.12464	9.8287	1	1
1600027N09Rik	3.86529	3.4859	3	5
1600029D21Rik	6.78169	0.307495	3	1
1600029O15Rik	0.12951	0.0309115	1	1
1700001C02Rik	0.269428	0	1	0
1700001C19Rik	0.381661	0.0733457	2	1
1700001G11Rik	0.377755	0.541753	2	2
1700001J03Rik	0.222083	0.491094	1	4
1700001J11Rik	0	0.0267541	0	1
1700001K19Rik	0.155077	0.0788356	1	1
1700001L05Rik	0.206773	0.365946	2	2
1700001L19Rik	0.205304	0.218785	2	2
1700001O22Rik	0.461894	0	3	0
1700001P01Rik	0.0276333	0.123162	1	2
1700003E16Rik	1.31779	0.173158	3	1
1700003F12Rik	0.0838104	0.030222	1	1
1700003M02Rik	0.203352	0.0300147	3	1
1700003M07Rik	0.627044	0.322101	3	4
1700007G11Rik	0.0313767	0	1	0
1700007K13Rik	0.476651	0.0609677	1	1
1700008J07Rik	0.381851	0.30707	1	1
1700008O03Rik	0.56024	0.186129	4	1
1700009J07Rik	0.0284131	0	1	0
1700009P17Rik	1.66717	0.924479	4	5
1700010I14Rik	0.329682	0.259387	2	4
1700011F03Rik	0	0.0265005	0	1
1700011H14Rik	0.400855	0	1	0
1700011I03Rik	0.105102	0.0620712	1	1
1700011L22Rik	0.275891	0.0795432	1	1
1700012A16Rik	0.0468173	0	1	0
1700012B07Rik	0	0.0496889	0	1
1700012B15Rik	3.29426	4.50991	1	1
1700012D14Rik	0.335892	0.345099	2	2
1700012L04Rik	0.0611873	0	1	0
1700013F07Rik	0.341003	0.0250955	3	1
1700014N06Rik	0	0.0299887	0	1
1700016C15Rik	0.0640909	0	1	0
1700016H13Rik	0.0652345	0	1	0
1700016K19Rik	0.0748798	0	1	0
1700016M24Rik	0	0.0794158	0	1
1700017B05Rik	10.4352	24.9747	4	4
1700017J07Rik	0	0.0398358	0	1
1700018A04Rik	0.25256	0.0405288	3	1
1700018L02Rik	1.59741	0.778124	1	1
1700018L24Rik	0.0360165	0	1	0
1700019D03Rik	0.400343	0.346352	3	2
1700019E19Rik	30.9701	20.5293	2	3
1700019G17Rik	1.03809	0.436672	2	3
1700019L03Rik	0.0534469	0.100726	1	1
1700019N12Rik	0.194066	0.105196	1	2
1700019N19Rik	0	0.0351067	0	1
1700020A23Rik	0	0.033758	0	1
1700020C07Rik	0	0.0852025	0	1
1700020D05Rik	0.263256	0.828288	1	1
1700020I14Rik	23.3041	19.4057	3	3
1700020L24Rik	1.27088	0.210756	1	1
1700020O03Rik	4.86582	5.77878	4	4
1700021C14Rik	2.7123	1.42765	7	6
1700021F05Rik	14.2163	10.0141	1	1
1700021F07Rik	0	0.049789	0	1
1700021K19Rik	8.74593	10.5694	8	8
1700023A16Rik	0.0396183	0	1	0
1700023L04Rik	0.107788	0.172105	1	1
1700025F24Rik	0.039831	0	1	0
1700025G04Rik	10.0122	15.8912	2	2
1700025K23Rik	2.90015	1.66602	3	4
1700025N23Rik	0	0.0597535	0	1
1700026D08Rik	0.0426011	0	1	0
1700026J04Rik	0.0370796	0.0809119	1	2
1700027A23Rik	0.0652376	0	1	0
1700027D21Rik	0.0490168	0.0603584	1	1
1700027L20Rik	0.0457353	0	1	0
1700028B04Rik	0	0.0793544	0	1
1700028J19Rik	0.485129	0.329063	2	2
1700028K03Rik	0	0.233253	0	2
1700029F09Rik	3.38858	2.03622	4	4
1700029G01Rik	3.14471	4.98288	5	5
1700029H14Rik	0.0464285	0	1	0
1700029I15Rik	0	0.141245	0	1
1700029J07Rik	0.956111	1.72208	5	6
1700029J11Rik	0.257307	0	1	0
1700030C10Rik	0.898585	0.980109	1	1
1700030J22Rik	0.235672	0.249662	1	1
1700030K09Rik	2.42845	2.72805	1	1
1700030L20Rik	0.15471	0.514651	1	1
1700034F02Rik	0.0457035	0.0405606	1	1
1700034H14Rik	12.4121	10.1428	3	4
1700034H15Rik	0.029645	0.0374794	1	1
1700034I23Rik	0	0.0269532	0	1
1700034P13Rik	0.371563	0.20104	1	1
1700037C18Rik	2.86309	1.3341	2	2
1700037H04Rik	9.85219	2.29444	1	1
1700040I03Rik	5.77906	6.05555	3	3
1700040L02Rik	3.47428	0.0599409	2	1
1700045I19Rik	0.18081	0.044165	1	1
1700047I17Rik2	6.68928	5.14506	1	1
1700047M11Rik	0.614896	0.0683039	2	1
1700048O20Rik	1.62709	1.00132	2	2
1700049G17Rik	0.60187	1.01839	2	2
1700052K11Rik	1.40986	1.55341	1	1
1700052N19Rik	2.94074	7.09433	3	5
1700054N08Rik	0.413198	0.373124	2	3
1700055N04Rik	0	0.030123	0	1
1700056E22Rik	0.683716	0.243359	1	1
1700057H15Rik	0	0.0298913	0	1
1700060C20Rik	0	0.189956	0	1
1700061F12Rik	0.0534288	0	1	0
1700061G19Rik	0.506002	0.156267	1	1
1700065D16Rik	0.0269532	0.0302261	1	1
1700065J11Rik	0.0714138	0	1	0
1700065J18Rik	0	0.136415	0	1
1700066B19Rik	0.150536	0	1	0
1700066M21Rik	1.82287	0.928147	3	3
1700067K01Rik	0.104445	0.122518	2	1
1700081L11Rik	10.6886	15.9858	8	8
1700084C01Rik	0.172178	0.0618688	2	1
1700084E18Rik	0	0.57001	0	1
1700086L19Rik	0.125278	0.0375607	1	1
1700086O06Rik	1.8186	2.93806	3	3
1700088E04Rik	3.49585	0.419476	2	1
1700093K21Rik	0	0.0834118	0	1
1700094D03Rik	5.36051	7.4865	3	3
1700095B22Rik	0.301682	0.0461181	1	1
1700101E01Rik	0.059152	0.23426	1	3
1700102P08Rik	0.432368	0.477008	1	1
1700106N22Rik	3.30305	2.26977	4	4
1700108F19Rik	0.205011	0	1	0
1700109F18Rik	0.034051	0.108485	1	1
1700109H08Rik	0	0.374628	0	1
1700110I01Rik	0	0.0396218	0	1
1700112E06Rik	0.873287	0.380712	2	2
1700113H08Rik	0.0962304	0	1	0
1700113I22Rik	6.17485	2.04971	2	2
1700123I01Rik	0.520096	0.11207	2	1
1700123L14Rik	0	0.0428963	0	1
1700123M08Rik	0.524876	0.738682	4	5
1700123O20Rik	14.7182	11.9893	1	1
1700125D06Rik	0.100497	0.0298801	1	1
1700125H03Rik	0	0.758261	0	2
1700125H20Rik	0.0302594	0	1	0
1810006J02Rik	0.0885524	0	1	0
1810006K21Rik	92.4633	91.4453	2	2
1810008A18Rik	9.90793	9.75231	1	1
1810009A15Rik	23.1256	16.5229	1	1
1810010D01Rik	0.291052	0.268387	3	2
1810010H24Rik	3.86775	22.4374	3	6
1810011H11Rik	0.492109	0.0585924	2	1
1810012P15Rik	2.07907	0.708641	2	2
1810013D10Rik	21.7232	7.29376	3	2
1810013L24Rik	6.1232	6.81388	3	3
1810014B01Rik	2.76753	1.05352	2	2
1810014F10Rik	19.165	6.50495	1	1
1810019D21Rik	0.298208	0.0649128	2	1
1810019J16Rik	0.298259	0.0375365	3	1
1810020D17Rik	24.7796	15.3019	4	4
1810021B22Rik	1.16487	1.13464	4	3
1810022K09Rik	79.1952	36.6389	2	2
1810024B03Rik	2.12338	2.23573	3	3
1810026B05Rik	2.65289	2.82228	1	1
1810026J23Rik	12.8831	10.6069	1	1
1810027O10Rik	81.6362	45.9652	3	3
1810029B16Rik	1.45253	1.44886	5	4
1810030J14Rik	5.19494	4.58635	1	1
1810030N24Rik	16.9658	8.3101	3	3
1810030O07Rik	5.77068	8.18266	1	1
1810031K17Rik	25.7114	20.5468	4	4
1810032O08Rik	2.97269	5.98318	5	6
1810033B17Rik	0.105843	0	1	0
1810035L17Rik	60.9854	27.8789	1	1
1810037I17Rik	48.2436	49.7098	1	1
1810041L15Rik	17.8012	1.1733	6	3
1810043G02Rik	10.209	5.58942	1	1
1810043H04Rik	46.777	23.8801	1	1
1810044D09Rik	0.770016	0.208051	1	1
1810046J19Rik	30.8741	20.2728	1	1
1810048J11Rik	5.42107	4.56898	2	2
1810049H13Rik	8.31449	3.24937	2	3
1810053B23Rik	0	0.0255088	0	1
1810055G02Rik	11.3938	21.1386	3	3
1810058I24Rik	44.2236	27.33	2	2
1810062G17Rik	0.617171	1.48342	3	4
1810062O18Rik	0.379012	0.274853	1	1
1810063B05Rik	5.25102	3.88926	1	1
1810063B07Rik	6.73376	4.85964	4	3
1810065E05Rik	1.76304	1.54805	1	1
1810074P20Rik	5.97846	9.6702	3	5
2010001E11Rik	0.0818087	0	1	0
2010001M06Rik	3.86732	0.562585	1	1
2010002M12Rik	0.441855	0.0457387	2	1
2010002N04Rik	22.8977	64.9864	6	6
2010003K11Rik	0.951298	0.0462272	1	1
2010003K15Rik	0.393993	0.0700471	1	1
2010005H15Rik	0.0628034	0.0699692	1	1
2010007H12Rik	18.3292	14.3782	4	4
2010009K17Rik	0.372188	0.245103	1	1
2010011I20Rik	9.6888	20.0872	1	1
2010012O05Rik	8.13199	10.4499	2	3
2010015L04Rik	0.680735	0.389642	5	5
2010106E10Rik	1.61316	0.0939238	2	1
2010106G01Rik	11.8754	26.0835	3	3
2010107E04Rik	252.265	115.906	1	1
2010107G12Rik	0.900264	0.506317	2	4
2010107G23Rik	3.44085	0.876885	4	4
2010107H07Rik	13.3651	15.5664	2	3
2010109I03Rik	3.33474	0.106074	2	1
2010110P09Rik	2.49059	0.936356	3	5
2010111I01Rik	50.2232	36.5614	11	12
2010204K13Rik	4.64922	1.533	3	3
2010300C02Rik	1.68661	0.649599	4	3
2010305A19Rik	1.16749	0.825948	1	1
2010317E24Rik	0.180559	0.0464445	3	1
2010321M09Rik	7.19205	5.75131	2	2
2200002D01Rik	18.0383	2.29806	2	2
2200002J24Rik	0.054592	0	1	0
2200002K05Rik	3.43655	0.50092	4	2
2210009G21Rik	0.572738	0.437945	2	2
2210010C04Rik	0.225611	0	1	0
2210010C17Rik	0.855054	0.283112	3	2
2210012G02Rik	2.63846	2.41395	1	1
2210013O21Rik	29.0557	24.5202	1	1
2210015D19Rik	5.05594	4.75452	2	2
2210016F16Rik	18.2228	12.4971	2	2
2210016L21Rik	26.5139	18.4884	1	2
2210018M11Rik	5.45153	7.02315	9	10
2210019I11Rik	0.101295	0	2	0
2210020M01Rik	2.41775	0.924272	5	3
2210021J22Rik	14.9449	6.83864	6	5
2210039B01Rik	0.522673	0.413423	1	1
2210403K04Rik	10.5106	10.9444	3	3
2210404J11Rik	2.92475	3.95728	2	2
2210404O07Rik	8.40366	2.77281	6	2
2210407C18Rik	0.718124	0.0407747	1	1
2210408F21Rik	4.67672	4.27297	7	6
2210408I21Rik	1.03825	1.53671	5	3
2210409E12Rik	0.0432674	0	1	0
2210411K11Rik	1.25899	0.563333	1	1
2210415F13Rik	40.9433	5.95485	3	3
2210417K05Rik	0.574409	0.263343	1	1
2300009A05Rik	12.716	8.79984	1	1
2310001A20Rik	14.6206	15.6424	1	1
2310001H17Rik	3.00738	0.378297	3	3
2310003C23Rik	18.4828	17.3536	6	5
2310003F16Rik	111.686	65.9798	2	2
2310003H01Rik	6.61841	8.22575	2	2
2310003L22Rik	13.5044	4.71324	9	7
2310004I24Rik	6.41136	7.14718	4	4
2310004N24Rik	19.0627	15.249	1	1
2310005G13Rik	0.0251	0	1	0
2310007B03Rik	0.0311809	0	1	0
2310008H04Rik	2.33227	2.8854	1	1
2310008H09Rik	3.71559	4.47817	2	2
2310009A05Rik	16.3786	12.7327	1	1
2310009B15Rik	7.17698	7.09377	2	3
2310010M20Rik	0.0320361	0.0515796	1	1
2310011J03Rik	14.2755	16.2921	1	1
2310014F07Rik	0	0.0309955	0	1
2310014H01Rik	29.9259	24.7738	4	4
2310014L17Rik	0.0315966	0	1	0
2310015A10Rik	4.58528	4.93875	2	2
2310015B20Rik	0.856199	0.356181	2	2
2310015D24Rik	0.0278051	0	1	0
2310016C08Rik	5.83885	7.55231	1	1
2310016M24Rik	44.672	36.426	1	1
2310021P13Rik	13.6278	27.8328	1	1
2310022A10Rik	5.68355	5.53326	2	2
2310022B05Rik	32.8884	76.094	1	1
2310028H24Rik	10.5434	10.1537	6	10
2310028O11Rik	34.9871	16.6874	4	3
2310030G06Rik	1.92089	0.890179	2	2
2310030N02Rik	4.98066	2.54567	4	5
2310033P09Rik	8.21103	7.69887	1	1
2310034G01Rik	0.0679855	0.351774	1	1
2310035C23Rik	3.95592	5.29242	4	3
2310035K24Rik	17.0161	11.2881	4	5
2310036O22Rik	59.0702	49.0213	1	1
2310037I24Rik	16.1773	26.0391	5	5
2310039H08Rik	12.1535	13.2933	1	1
2310040G24Rik	0.981875	0.387684	3	3
2310042D19Rik	0	0.115375	0	1
2310043J07Rik	0.0762788	0	1	0
2310044G17Rik	9.48278	4.96886	4	4
2310044H10Rik	126.905	111.107	2	2
2310045N01Rik	20.3996	17.0413	4	4
2310046A06Rik	0.864929	0.0367753	4	1
2310046K01Rik	1.03676	0.0449862	3	1
2310046O06Rik	6.29985	7.91482	2	2
2310047B19Rik	3.38524	5.89639	2	2
2310047M10Rik	12.7662	14.6499	1	1
2310050B05Rik	6.61376	0.0483775	2	1
2310057J16Rik	2.34232	0.610399	11	5
2310057J18Rik	0.0831952	0	1	0
2310057M21Rik	2.98318	2.62202	2	4
2310061C15Rik	9.52406	4.17427	3	3
2310061I04Rik	13.6989	7.8936	2	2
2310061J03Rik	5.6586	5.08032	1	1
2310067B10Rik	5.35869	6.60351	1	1
2310068J16Rik	0.364021	0.525724	1	1
2310069B03Rik	0.0754543	0	1	0
2310069G16Rik	0.462088	0.16894	1	1
2310079F23Rik	1.43723	1.62878	4	5
2400001E08Rik	51.4891	55.3146	2	2
2400003C14Rik	25.1905	33.862	5	5
2410001C21Rik	27.5439	20.7352	1	1
2410002F23Rik	11.8075	21.9615	7	8
2410002I01Rik	3.47691	5.83603	2	3
2410002O22Rik	11.4262	10.0309	5	5
2410003K15Rik	12.0892	8.66061	1	1
2410004A20Rik	0.0310018	0.0258894	1	1
2410004B18Rik	6.15034	6.74034	4	5
2410004I01Rik	1.00539	0.191581	1	1
2410004N09Rik	6.75246	8.55952	2	2
2410004P03Rik	0.868716	0.932651	2	3
2410006H16Rik	15.9669	26.1987	1	1
2410015M20Rik	48.9526	31.7632	1	1
2410016O06Rik	3.18712	2.46316	1	1
2410017P09Rik	1.82804	1.54535	1	1
2410018L13Rik	0.541708	0.480406	2	2
2410018M08Rik	149.799	62.0672	3	3
2410022L05Rik	13.8211	6.84363	2	2
2410042D21Rik	4.0934	5.70444	3	3
2410057H14Rik	0.0446293	0	1	0
2410066E13Rik	13.8775	6.88429	3	1
2410075B13Rik	1.23986	1.08057	1	1
2410076I21Rik	1.03844	1.4021	2	2
2410088K16Rik	0	0.0348716	0	1
2410089E03Rik	5.57525	9.48489	8	8
2410091C18Rik	11.6405	7.56884	7	7
2410127L17Rik	8.48615	8.66854	4	4
2410131K14Rik	2.03496	2.27052	1	1
2410137M14Rik	0.0751041	0	1	0
2500003M10Rik	33.0661	40.8186	4	4
2500004C02Rik	1.05842	0.722085	1	1
2510002D24Rik	6.3313	4.40436	2	2
2510003E04Rik	19.169	12.1793	1	1
2510006D16Rik	27.7145	22.9395	1	1
2510009E07Rik	9.29926	15.7593	2	2
2510012J08Rik	8.50693	11.3476	1	2
2510039O18Rik	25.7326	22.7014	3	3
2510049J12Rik	0.576543	0.0599398	2	1
2600006L11Rik	0.060639	0	1	0
2610001J05Rik	60.4793	30.3236	4	3
2610002D18Rik	0	0.0643274	0	1
2610002I17Rik	1.94119	2.24554	2	3
2610002J02Rik	23.5065	18.3937	2	3
2610002M06Rik	2.74809	3.46927	1	1
2610005L07Rik	7.47178	15.4771	4	3
2610008E11Rik	3.38784	4.75186	2	2
2610015P09Rik	1.62041	1.75957	6	7
2610017I09Rik	0.776439	0.218409	3	2
2610018G03Rik	7.68949	1.58311	5	4
2610019F03Rik	5.01676	4.5313	4	4
2610020C07Rik	0.188944	0.658196	1	1
2610020H08Rik	0.484751	1.06837	7	6
2610021K21Rik	0.125026	0	1	0
2610024G14Rik	6.42566	3.41817	3	2
2610027L16Rik	10.4243	9.02972	3	4
2610028E06Rik	0.297401	3.88863	5	6
2610028H24Rik	0.0381527	0	1	0
2610029G23Rik	12.8337	11.7931	6	6
2610029I01Rik	14.1969	1.33105	1	2
2610034B18Rik	9.41146	12.5083	3	4
2610035D17Rik	3.96014	4.83499	2	4
2610039C10Rik	2.65307	2.11831	2	4
2610044O15Rik	3.5531	3.5475	6	6
2610101N10Rik	5.05774	7.86518	6	5
2610109H07Rik	0.0875133	0	1	0
2610203C20Rik	7.57612	14.8948	3	3
2610203C22Rik	0.693535	0.783337	2	2
2610204G22Rik	1.54878	1.31238	6	4
2610206C17Rik	0.0570125	0.0646407	1	1
2610301B20Rik	11.2044	13.2475	4	4
2610301G19Rik	8.29768	12.7136	1	1
2610305D13Rik	1.5988	2.45033	2	4
2610306M01Rik	3.86821	2.29488	1	1
2610318N02Rik	0.14331	0	1	0
2610507B11Rik	35.8491	35.5356	4	5
2610507I01Rik	4.10261	4.66925	3	3
2610524H06Rik	4.22931	7.54362	1	1
2610528A11Rik	0.572508	0.361592	1	1
2610528E23Rik	5.33692	3.6193	5	3
2610528J11Rik	0.534965	0.07827	1	1
2700007P21Rik	5.33134	9.60439	4	4
2700023E23Rik	2.18924	1.8531	2	2
2700029M09Rik	15.2067	9.16562	1	1
2700046A07Rik	0.0318905	0	1	0
2700046G09Rik	0.601738	0.498155	1	1
2700049A03Rik	2.83718	3.1656	5	4
2700050L05Rik	2.89859	4.28224	5	5
2700060E02Rik	85.1855	54.0835	4	4
2700062C07Rik	5.34647	6.93204	4	3
2700078E11Rik	7.63704	6.6202	4	4
2700078K21Rik	35.5991	17.2964	4	4
2700081O15Rik	12.1823	17.7607	1	1
2700086A05Rik	0.226556	0	1	0
2700089E24Rik	29.0432	24.1052	1	1
2700090O03Rik	0.53715	0.0305236	1	1
2700094K13Rik	16.0577	10.5374	2	2
2700097O09Rik	3.44619	5.55347	4	4
2700099C18Rik	0.747356	0.461342	3	3
2810001G20Rik	5.9414	7.59864	1	1
2810002D19Rik	4.15188	3.34391	1	1
2810002N01Rik	18.8157	16.3799	2	2
2810004N23Rik	8.62712	4.4461	3	3
2810006K23Rik	3.6457	2.60057	2	2
2810008D09Rik	13.6148	22.2109	1	1
2810008M24Rik	30.939	66.0163	2	2
2810021B07Rik	5.40649	3.82278	3	3
2810021J22Rik	0.946942	1.39995	2	3
2810025M15Rik	20.7612	5.97098	1	1
2810030E01Rik	0.850295	0.218323	1	1
2810032G03Rik	1.81935	0.908682	3	2
2810046L04Rik	3.2195	5.91678	3	4
2810047C21Rik1	1.09819	1.46461	6	5
2810055F11Rik	5.08501	9.2297	6	6
2810055G20Rik	11.9567	17.8569	8	9
2810403A07Rik	11.2074	18.4288	6	7
2810403D21Rik	0.926679	0.653939	5	4
2810405F15Rik	3.29505	8.67139	1	1
2810405K02Rik	17.759	22.2636	1	2
2810407C02Rik	39.3251	33.9876	4	4
2810408A11Rik	0.257844	0.180845	3	2
2810408I11Rik	0.0445629	0.0709343	1	1
2810408M09Rik	6.44287	7.12608	2	2
2810410L24Rik	1.46021	1.28458	4	4
2810417H13Rik	0.567013	0.185585	1	2
2810422J05Rik	25.277	15.5937	1	1
2810422O20Rik	2.31148	2.43595	2	2
2810428I15Rik	60.6473	36.0205	1	1
2810429I04Rik	0.15829	0	1	0
2810432D09Rik	20.6762	16.1547	1	1
2810432L12Rik	13.1271	4.73714	2	2
2810433D01Rik	1.57903	0.596769	7	6
2810442I21Rik	0.199768	0.183063	3	2
2810442N19Rik	0	0.131081	0	1
2810453I06Rik	17.7491	12.5538	3	4
2810459M11Rik	0.0357735	0	1	0
2810474O19Rik	1.82625	2.73278	1	1
2900002K06Rik	0.0749914	0.158019	1	1
2900005J15Rik	0.218893	2.03731	1	1
2900006K08Rik	0.246773	0.070651	1	1
2900010M23Rik	119.141	85.6374	1	1
2900011O08Rik	4.65386	0.292079	2	1
2900026A02Rik	2.73479	1.10886	8	5
2900041M22Rik	2.66805	1.23508	1	1
2900053A13Rik	23.7627	14.3585	3	3
2900056M20Rik	3.32341	3.63531	3	5
2900060B14Rik	0.252587	0.211438	1	1
2900064A13Rik	8.77837	11.8049	2	2
2900073G15Rik	140.817	228.775	4	6
2900079G21Rik	0.663348	0.0576621	1	1
2900097C17Rik	41.7301	81.5444	1	1
3010026O09Rik	1.96751	1.57093	1	1
3110001D03Rik	27.1292	20.8886	1	1
3110001I22Rik	1.00582	1.30446	1	1
3110002H16Rik	6.69444	6.24883	1	1
3110003A17Rik	53.528	29.3499	2	3
3110007F17Rik	1.10035	1.57763	3	3
3110009E18Rik	1.88764	1.90845	3	4
3110035E14Rik	0.10477	0.0263365	1	1
3110039I08Rik	0.69366	0.239445	4	2
3110040N11Rik	11.5485	6.90311	5	5
3110043O21Rik	4.50404	4.55952	2	4
3110045C21Rik	0.258405	1.68525	2	2
3110047P20Rik	0.03758	0.0801085	1	1
3110052M02Rik	2.02612	4.08616	7	8
3110056O03Rik	8.49489	15.6626	3	4
3110057O12Rik	1.12069	1.97513	4	4
3110062M04Rik	1.0385	2.3393	3	3
3110082D06Rik	0.168233	0	2	0
3110082I17Rik	4.43989	3.14517	3	3
3110099E03Rik	1.13406	4.12129	4	4
3200002M19Rik	6.44757	3.91478	2	2
3230401D17Rik	14.8799	13.3615	2	2
3300002I08Rik	0.275526	0.777057	2	3
3425401B19Rik	0.295699	0	1	0
3632451O06Rik	6.4417	3.62395	3	3
3632454L22Rik	0.0311375	0	1	0
3830403N18Rik	4.86608	4.3004	2	2
3830406C13Rik	11.779	8.94143	3	3
3830408C21Rik	0.521816	1.43618	4	8
3830431G21Rik	0.836322	3.07289	2	5
3930402G23Rik	0.100115	0.780442	1	5
4430402I18Rik	0.500986	0.268466	3	2
4632411B12Rik	14.238	14.5258	4	4
4632415K11Rik	5.44667	5.02611	4	3
4632427E13Rik	0.330306	0.27345	1	2
4632428C04Rik	0.893603	0.538757	4	5
4632428N05Rik	7.89281	8.64584	2	2
4632434I11Rik	0.15933	0.142042	2	1
4732415M23Rik	0.73573	0.0964907	2	2
4732418C07Rik	7.56723	10.0326	2	2
4732456N10Rik	0.208811	0	1	0
4732471D19Rik	0.887288	1.28555	1	1
4732471J01Rik	0.0542817	0.174166	1	1
4732490B19Rik	0.0448311	0	1	0
4831426I19Rik	0.543607	1.47484	3	3
4833403I15Rik	4.26227	0.10647	5	2
4833418N02Rik	0.401468	0.601493	3	5
4833419F23Rik	0.932988	0.463738	2	2
4833420G17Rik	8.60132	17.959	9	10
4833422C13Rik	0.226957	2.34054	2	3
4833424O15Rik	2.38535	0.32584	2	2
4833439L19Rik	44.955	32.8353	3	4
4833442J19Rik	9.05808	2.46524	4	4
4921507P07Rik	1.2295	0.906168	4	4
4921511H03Rik	0	0.0530141	0	1
4921513D23Rik	11.774	15.6939	8	10
4921513I03Rik	0	0.0610869	0	1
4921515J06Rik	0	0.05123	0	1
4921517L17Rik	0.430642	1.16501	1	1
4921523A10Rik	0.0754534	0.0866527	1	1
4921524J17Rik	7.29029	6.88932	2	2
4921530L18Rik	0.149845	0.0433324	1	1
4921531C22Rik	0.578052	0.856024	2	2
4921536K21Rik	0.0687246	0.0710059	1	2
4922501C03Rik	1.05098	1.4547	2	4
4922501L14Rik	0.550208	0.0895842	4	1
4922505G16Rik	0	0.0372079	0	1
4930402H24Rik	29.7682	12.9348	7	7
4930404I05Rik	0.270128	0.618283	1	1
4930404N11Rik	0.161706	0.270428	1	1
4930405A21Rik	0.490419	0.139642	3	1
4930412C18Rik	0.400805	0.255455	3	5
4930412F15Rik	0.702749	0.604759	1	1
4930414N06Rik	0.0330448	0.976474	1	2
4930415F15Rik	0	0.0397466	0	1
4930415O20Rik	0.14952	0.615649	2	1
4930417G10Rik	0	0.0462536	0	1
4930420K17Rik	0.633247	1.65487	1	1
4930422G04Rik	0.707389	0.674496	5	6
4930427A07Rik	0.42006	0.301717	2	3
4930429B21Rik	1.63233	0.377138	1	1
4930430F08Rik	3.72072	1.72774	1	1
4930432K21Rik	0.278871	0.177962	4	2
4930433B08Rik	0	0.0265486	0	1
4930441O14Rik	0.0617836	0.0521993	1	1
4930444A02Rik	4.49635	6.72575	3	4
4930444G20Rik	0	0.081103	0	1
4930447C04Rik	0.30281	0.0613524	3	1
4930448H16Rik	0	0.0533966	0	1
4930451C15Rik	0.200689	0.130405	3	3
4930452B06Rik	0.64538	0.0533658	2	1
4930453N24Rik	5.76529	4.98189	2	2
4930455C21Rik	8.63718	7.17191	2	2
4930455F23Rik	6.89321	1.64007	5	4
4930467E23Rik	0.0282737	0.22007	1	3
4930469G21Rik	0	0.0354258	0	1
4930471G03Rik	0	0.0260253	0	1
4930471M23Rik	8.54147	9.11356	2	2
4930473A06Rik	0.58381	1.84756	4	6
4930474M22Rik	0.0888947	0.222579	1	1
4930474N09Rik	0.0399256	0	1	0
4930481A15Rik	4.43227	3.12252	3	3
4930486L24Rik	0.435666	0.238327	1	1
4930488L21Rik	0	0.0491199	0	1
4930502A04Rik	0.0362419	0.442388	1	1
4930503B20Rik	0.14988	0	2	0
4930503L19Rik	3.07871	3.39416	7	7
4930505A04Rik	0.0446231	0	1	0
4930506M07Rik	2.30692	0.475467	2	3
4930507D05Rik	0.0581935	0.0488504	1	1
4930511I11Rik	0	0.0392014	0	1
4930511M06Rik	5.34553	0.60764	3	3
4930513N10Rik	0.0906264	0.0985988	1	1
4930515G01Rik	0.230471	0.125766	1	1
4930519F09Rik	0.431092	0.633214	1	1
4930519G04Rik	0.0383822	0.118426	1	1
4930520O04Rik	0.495011	0.0668552	3	1
4930521E06Rik	0	0.104405	0	1
4930523C07Rik	6.69921	11.2347	4	4
4930524L23Rik	0.0560228	0.0523133	1	1
4930525D18Rik	0	0.0721607	0	1
4930525F21Rik	0.114873	0	1	0
4930528A17Rik	0	0.108705	0	1
4930528F23Rik	0.0685469	1.11647	1	5
4930534B04Rik	0.912023	1.19871	4	3
4930538K18Rik	0.270666	0.319478	2	2
4930539E08Rik	0.155384	0	2	0
4930539J05Rik	0.0398057	0.177827	1	1
4930544O15Rik	0.151648	0	1	0
4930546K05Rik	0	0.0291042	0	1
4930547N16Rik	0.202515	0.0646267	2	1
4930550C14Rik	0.29569	0.345951	2	3
4930550L24Rik	0.0274833	0	1	0
4930555G01Rik	0.0373233	0.275286	1	1
4930555I21Rik	0.283721	0.105545	3	2
4930557A04Rik	0.0801218	0	1	0
4930558C23Rik	0	0.0505973	0	1
4930562C15Rik	0.637807	1.03302	2	2
4930562F07Rik	0	0.154402	0	1
4930563E22Rik	0.148692	0.183153	1	1
4930567H12Rik	0.234833	0	1	0
4930570G19Rik	0.105034	0.227856	2	4
4930572J05Rik	13.1833	5.36394	1	1
4930578C19Rik	0.427968	0.0442121	3	1
4930578N16Rik	1.14409	0.699591	9	7
4930579C15Rik	0.0461637	0.336797	1	3
4930579G22Rik	1.57227	0.873943	1	1
4930579G24Rik	1.27473	2.57814	1	2
4930579J09Rik	0.160258	0.13702	2	2
4930579K19Rik	0.293839	0.384674	1	1
4930581F22Rik	0.243867	1.1988	1	1
4930583H14Rik	0.917595	7.01083	2	2
4930583K01Rik	0	0.0604712	0	1
4930588N13Rik	0.093362	0.205918	2	4
4930590J08Rik	0.0871831	0.116045	1	1
4930592I03Rik	0	0.0682868	0	1
4930594C11Rik	0.0354158	0	1	0
4931402G19Rik	0	0.0552466	0	1
4931403G20Rik	0	0.0382178	0	1
4931406C07Rik	9.37651	7.45108	3	2
4931406H21Rik	0	0.0649348	0	1
4931406P16Rik	7.61746	7.20501	4	3
4931408A02Rik	2.11981	1.34641	7	6
4931408D14Rik	0	0.052232	0	1
4931414P19Rik	1.43791	2.08659	1	2
4931417G12Rik	0.03064	0	1	0
4931423N10Rik	0	0.0262983	0	1
4931428F04Rik	0.960337	0.474008	2	3
4931429I11Rik	0.130812	0	1	0
4931429L15Rik	0.0289488	0	1	0
4931429P17Rik	0	0.0647716	0	1
4931440F15Rik	0.0390668	0.0418413	1	1
4931440P22Rik	0.173617	0.076285	1	1
4932415G12Rik	2.28598	2.04362	2	5
4932416H05Rik	2.92603	1.68747	1	1
4932418E24Rik	0.693745	0.0352355	5	1
4932425I24Rik	0.453228	0.157982	3	2
4932435O22Rik	0.0416965	0.0567529	1	1
4932438A13Rik	6.08513	9.86955	7	10
4932438H23Rik	0.717109	2.46836	5	5
4932441J04Rik	0.116976	0.138509	1	1
4932443I19Rik	0.753195	0.0708778	4	2
4933403F05Rik	1.63039	1.48769	1	2
4933403G14Rik	1.59964	0.823267	1	1
4933403O03Rik	0	0.0268699	0	1
4933404M02Rik	0.297533	0.0522986	4	1
4933404O12Rik	2.07066	0.725854	2	2
4933405L10Rik	0.0255986	0.0255445	1	1
4933406C10Rik	0.537465	0.225763	5	5
4933406I18Rik	0.0681974	0	1	0
4933407C03Rik	19.7384	58.8942	3	3
4933407H18Rik	1.39492	4.81241	5	5
4933407K13Rik	0.293198	1.0535	2	4
4933407L21Rik	0.461275	0.0267089	2	1
4933408B17Rik	0.0831857	0.236661	1	2
4933409K07Rik	14.1733	13.2907	2	2
4933411G11Rik	0	0.0329895	0	1
4933411K20Rik	3.91721	4.04883	5	5
4933412E12Rik	2.10073	2.20513	5	5
4933413G19Rik	0.114425	0.0450318	1	1
4933416I08Rik	0	0.0392062	0	1
4933421E11Rik	3.50616	4.93267	5	7
4933421O10Rik	2.23084	1.90796	3	3
4933422A05Rik	0.0682248	0.0316888	1	1
4933422H20Rik	0	0.0398194	0	1
4933424B01Rik	5.32557	10.7041	5	6
4933424G06Rik	0	0.0760548	0	1
4933426D04Rik	0.123111	0.171081	1	1
4933426M11Rik	17.8229	33.1932	4	3
4933427D14Rik	2.3274	3.78827	4	4
4933427E11Rik	0	0.0646816	0	1
4933427G17Rik	0.0387055	0.0730829	1	1
4933430H15Rik	0.159712	0.442382	1	1
4933430I17Rik	0.075191	0.140539	1	1
4933431E20Rik	2.3812	1.8628	3	2
4933432B09Rik	0.571008	0.686987	4	4
4933432I09Rik	0.224459	0.325841	3	2
4933433G15Rik	0.0287568	0.0353316	1	1
4933433P14Rik	6.78899	6.05568	2	2
4933434E20Rik	16.1495	13.0271	3	3
4933436C20Rik	0.571921	0.071291	5	1
4933437F05Rik	0.176096	0.150876	2	2
4933439C10Rik	2.67687	5.77768	1	1
4933439F18Rik	10.7987	11.0192	1	1
4933439K11Rik	0.0878311	0.132104	2	1
5031410I06Rik	0.0262479	0	1	0
5031414D18Rik	0.79936	0.456308	4	3
5031425F14Rik	0.0872514	0	1	0
5031426D15Rik	0.0862854	0.0385022	1	1
5031434O11Rik	1.50732	0.505209	1	1
5031439G07Rik	5.54191	7.29308	2	2
5033406O09Rik	0.257206	0.105612	2	2
5033411D12Rik	0.4586	0.189805	3	2
5033414D02Rik	19.9674	18.4276	3	3
5133401N09Rik	7.90928	9.696	4	4
5330417C22Rik	1.35544	0.165907	5	3
5330426P16Rik	4.1732	5.70025	3	4
5330434G04Rik	0.552523	0	5	0
5330437I02Rik	0	0.0301575	0	1
5330439B14Rik	0	0.0482358	0	1
5430402O13Rik	0.430231	0.280876	2	2
5430405G05Rik	0.179787	0.0417835	1	1
5430405H02Rik	1.89348	1.59698	2	2
5430407P10Rik	7.39538	0.425459	4	3
5430411K18Rik	2.05594	3.32956	3	5
5430416N02Rik	2.20465	3.58251	4	5
5430416O09Rik	0.568924	7.50067	2	5
5430417L22Rik	42.9543	9.64834	1	1
5430421F17Rik	0	0.0276062	0	1
5430427O19Rik	0.0762302	0	1	0
5430435G22Rik	4.56212	9.69853	3	3
5430437P03Rik	40.7701	28.9923	3	3
5530601H04Rik	4.78995	5.23378	8	9
5730403B10Rik	20.4688	25.5619	6	7
5730405O15Rik	0.11004	0.114061	1	1
5730408K05Rik	1.96696	1.14221	1	1
5730409E04Rik	11.3936	8.67345	2	2
5730419I09Rik	3.28259	4.26842	6	6
5730422E09Rik	0.0600665	0.0341782	1	1
5730437N04Rik	65.4332	31.3935	1	1
5730455O13Rik	5.10498	5.57951	2	4
5730455P16Rik	4.23729	4.26449	1	1
5730469M10Rik	17.9815	37.1518	3	4
5730494M16Rik	8.42069	3.5291	4	4
5730494N06Rik	10.8691	10.4835	6	6
5730507C01Rik	0.399713	0.725291	1	2
5730508B09Rik	10.4013	1.41926	2	2
5730528L13Rik	6.12738	7.10697	4	4
5730559C18Rik	1.7919	0.874036	7	6
5730577I03Rik	0.295159	0.285873	3	2
5730590G19Rik	0.0358993	0	1	0
5830403L16Rik	0.0711405	0	1	0
5830405N20Rik	0.0613761	0	1	0
5830415F09Rik	1.50108	2.01129	5	5
5830416P10Rik	1.86216	0.124344	7	1
5830417I10Rik	2.80891	5.1589	2	2
5830418K08Rik	1.08999	2.43468	3	5
5830428M24Rik	0.0258898	0	1	0
5830432E09Rik	1.16019	1.37631	3	3
5830433M19Rik	2.2612	1.99017	3	3
5930412G12Rik	0.277845	0	4	0
5930416I19Rik	10.5444	7.49091	5	5
5930434B04Rik	14.1666	22.1471	4	4
6030405A18Rik	0.924218	0.989736	3	1
6030408B16Rik	0	0.108761	0	1
6030419C18Rik	7.746	6.2499	2	2
6030422M02Rik	0.0484082	0.131872	1	1
6030429G01Rik	0.959994	2.56494	6	9
6030446N20Rik	1.39763	2.24545	4	5
6030458C11Rik	4.18828	4.31762	2	2
6030466F02Rik	0.197403	0	2	0
6030468B19Rik	0	0.0601533	0	1
6230409E13Rik	5.67711	1.23232	5	4
6230427J02Rik	0.815262	3.53022	1	1
6330403A02Rik	21.9858	4.40626	4	4
6330403K07Rik	15.9901	2.96016	1	1
6330406I15Rik	8.03086	14.7295	2	2
6330407J23Rik	3.56313	0.251239	7	2
6330408A02Rik	2.5688	1.7053	3	4
6330409N04Rik	6.31346	3.30282	2	2
6330416G13Rik	1.82238	1.07265	3	2
6330439K17Rik	2.07587	5.29923	4	5
6330503K22Rik	3.18201	6.8992	5	7
6330512M04Rik	2.91514	0.136577	2	1
6330545A04Rik	0.714542	1.0992	3	4
6330549D23Rik	0.181337	0.199493	2	2
6330578E17Rik	16.9166	13.5325	2	2
6430527G18Rik	22.9246	29.5642	1	1
6430531B16Rik	0.0579304	0.0747856	1	1
6430548G04	0.19572	0.465102	1	1
6430548M08Rik	10.7967	13.4776	4	4
6430550D23Rik	0.18743	0.168989	3	2
6430562O15Rik	0.273308	0.477185	1	1
6430571L13Rik	0.454134	0.71754	2	3
6430573F11Rik	1.82155	4.20452	6	5
6430598A04Rik	5.66376	2.77797	5	5
6430704M03Rik	0.72477	0.145201	1	1
6430706D22Rik	8.73942	14.7361	1	1
6530401N04Rik	6.20451	6.04099	3	4
6530402F18Rik	0.579972	1.16012	1	1
6530418L21Rik	10.8898	0.810507	3	2
6720401G13Rik	4.463	15.542	11	13
6720456B07Rik	76.2117	56.4978	1	1
6720456H20Rik	3.57386	6.84763	2	2
6720463M24Rik	0.20906	0.494238	1	1
6720468P15Rik	0.511927	0.515215	3	5
6720483E21Rik	0.0326501	0.0498204	1	1
6720489N17Rik	0.639376	0.232944	2	2
6820408C15Rik	0.116843	0.0551355	1	1
6820431F20Rik	14.6732	27.1483	3	3
7530420F21Rik	0.309527	0.213695	2	3
8030442B05Rik	0	0.0524944	0	1
8030462N17Rik	4.62708	4.33384	5	6
8430406I07Rik	4.54617	3.45633	3	3
8430408G22Rik	5.49496	0.447024	2	2
8430410A17Rik	7.15438	13.2489	2	4
8430410K20Rik	15.7028	9.51283	1	1
8430419L09Rik	4.94598	7.76318	3	6
8430423G03Rik	0.0685983	0.162572	1	2
8430427H17Rik	6.52532	1.28724	5	4
8430429K09Rik	0.856965	0.59141	1	1
8430431K14Rik	0	0.05834	0	1
8430436N08Rik	0.0469637	0.216322	1	3
9030025P20Rik	1.99148	2.71058	1	1
9030224M15Rik	9.23277	2.87204	3	3
9030418K01Rik	1.44311	1.37321	3	2
9030425E11Rik	105.283	120.464	3	4
9030612E09Rik	0.996616	1.07879	1	1
9030617O03Rik	2.82299	1.1239	2	2
9030619P08Rik	0.0373195	0	1	0
9030624J02Rik	12.8021	14.8247	2	2
9030625A04Rik	1.86516	1.96645	3	6
9130008F23Rik	0.414707	0.197214	2	2
9130011E15Rik	5.24791	4.65081	2	3
9130011J15Rik	29.4124	43.2085	4	3
9130017N09Rik	3.69717	0.342951	5	3
9130019O22Rik	0.246209	0.390009	1	2
9130204L05Rik	0.0293424	0	1	0
9130206I24Rik	0.17634	0.0405898	2	1
9130230L23Rik	0.210253	0	2	0
9130401M01Rik	10.3083	9.65194	1	1
9130404H23Rik	0.231563	0	2	0
9230110C19Rik	1.83655	0.784431	4	3
9230112J17Rik	0.112819	0	1	0
9230114K14Rik	0.544931	0.42075	2	1
9230116N13Rik	0.0922008	0.108363	1	1
9330020H09Rik	0.0614491	0.0360904	1	1
9330133O14Rik	0.111355	0.395749	1	1
9330151L19Rik	1.03957	1.21323	1	1
9330158H04Rik	0.575674	0	1	0
9330159F19Rik	1.146	0.601731	4	4
9330159M07Rik	1.46425	0.823248	3	3
9330179D12Rik	1.09348	0.476057	2	2
9330182L06Rik	3.16389	0.50459	3	3
9430008C03Rik	2.32344	6.68995	11	12
9430015G10Rik	1.65947	3.37667	6	10
9430016H08Rik	9.82185	6.51166	1	1
9430020K01Rik	5.72469	1.91083	1	1
9430021M05Rik	0.204826	0	2	0
9430023L20Rik	16.4531	12.5813	2	2
9430031J16Rik	0.204461	0	2	0
9430037G07Rik	0.384133	0.307324	3	3
9430038I01Rik	2.7683	1.45464	4	4
9430041J12Rik	0.106928	0	1	0
9430060I03Rik	0	0.0403586	0	1
9430076C15Rik	0	0.0353803	0	1
9430083A17Rik	0.214596	0.162404	1	1
9430091E24Rik	0.325484	0.696234	2	2
9530008L14Rik	0.665261	0.0383206	2	1
9530026F06Rik	0.358614	0.0911779	3	1
9530026P05Rik	2.00255	2.97023	5	6
9530051G07Rik	0.0794279	0	1	0
9530053A07Rik	0.0408309	0.0357414	1	1
9530068E07Rik	129.806	113.773	1	1
9530077C05Rik	4.41276	0.911315	6	4
9530082P21Rik	2.53057	2.72523	2	2
9530091C08Rik	0.0465076	0.185331	1	1
9630028H03Rik	0	0.0378165	0	1
9630033F20Rik	11.9619	1.84053	2	3
9830001H06Rik	3.70304	7.55875	3	3
9830147E19Rik	0.650033	1.4955	1	1
9930012K11Rik	0.536485	2.50275	4	8
9930013L23Rik	0.353819	0.0742738	1	2
9930014A18Rik	0.413186	0.166696	2	3
9930021D14Rik	0	0.0444097	0	1
9930021J03Rik	2.76876	6.64917	8	8
9930023K05Rik	0.20728	3.53568	3	9
9930104L06Rik	5.61296	4.41741	5	5
9930111J21Rik1	0.566822	0.0823334	1	2
9930111J21Rik2	0.324506	0.02884	2	1
A030009H04Rik	1.5096	1.22187	1	1
A130010J15Rik	1.06346	1.36793	4	3
A130022J15Rik	3.86199	5.20658	5	5
A130040M12Rik	112.649	59.803	4	3
A1cf	0.123016	0.0258445	2	1
A230028O05Rik	0.0666996	0	2	0
A230046K03Rik	4.84284	7.39293	3	3
A230050P20Rik	9.62199	57.8052	3	7
A230051G13Rik	1.45623	1.10529	2	2
A230056P14Rik	0.589567	0.535948	1	1
A230057D06Rik	0.133259	0.14716	2	3
A230065H16Rik	2.85333	0.320994	3	1
A230072C01Rik	1.84086	2.19222	4	4
A230073K19Rik	0	0.140914	0	1
A230077H06Rik	0	0.0789121	0	1
A2ld1	16.3112	4.23955	1	1
A2m	0.12318	0.0535372	1	1
A330021E22Rik	1.66401	0.643265	6	6
A330023F24Rik	0.354212	0.0949533	1	1
A330035P11Rik	0.134475	0.241818	1	2
A330040F15Rik	0.104266	0.370232	1	1
A330049M08Rik	0.133352	0.0458551	2	1
A330049N07Rik	0.0454497	0	1	0
A330050B17Rik	0.113887	0.0355522	1	1
A330050F15Rik	0.0733381	0	1	0
A330069E16Rik	0.524323	0.193867	1	1
A330076H08Rik	0.0801976	0.0524449	2	2
A330093E20Rik	0.0263085	0	1	0
A3galt2	0.0354657	0.103609	1	2
A430005L14Rik	14.2073	10.1205	2	3
A430033K04Rik	0.807283	1.07381	1	1
A430035B10Rik	0	0.464599	0	1
A430078G23Rik	1.51217	0.840009	1	1
A430084P05Rik	0.567603	0.0472656	1	1
A430105I19Rik	14.2829	3.39058	7	8
A430107O13Rik	33.9085	20.9249	3	3
A430110N23Rik	24.3857	216.193	4	5
A4galt	21.2034	39.2702	6	5
A4gnt	0.0981316	0	1	0
A530013C23Rik	0.0311105	0	1	0
A530016L24Rik	0.287805	0.20984	2	2
A530032D15Rik	0.040001	0.062878	1	2
A530054K11Rik	0.649659	1.06219	1	1
A530058N18Rik	0.29901	0	1	0
A530098C11Rik	0.0272108	0.0315549	1	1
A530099J19Rik	0.0360139	0	1	0
A630001G21Rik	0.173601	0.0382442	2	1
A630007B06Rik	5.65181	8.80327	4	3
A630033H20Rik	0.0835182	0.128495	1	1
A630055G03Rik	0	0.0444941	0	1
A630066F11Rik	0.516455	0.69721	1	1
A630072M18Rik	1.0957	2.22326	1	1
A630075F10Rik	0.0464554	0.284331	1	2
A630077J23Rik	0	0.823888	0	3
A630089N07Rik	0.2933	0.689351	2	3
A730008H23Rik	1.87239	1.68397	1	1
A730011L01Rik	3.66012	4.32714	3	4
A730017C20Rik	7.92835	1.53275	5	3
A730017L22Rik	0.942686	1.0324	4	4
A730020E08Rik	0.0416518	0	1	0
A730020M07Rik	0.731789	0.360083	4	4
A730043L09	0.121576	0	1	0
A730046J19Rik	0.926718	0.0482293	1	1
A730056A06Rik	3.16685	3.19105	2	2
A730069N07Rik	0	0.159894	0	1
A730085A09Rik	0	0.0749751	0	1
A730090H04Rik	0.356858	0	1	0
A730090N16Rik	0	0.135782	0	1
A730098P11Rik	53.2541	43.4968	1	1
A830007P12Rik	6.46098	16.0774	2	3
A830010M20Rik	0.812727	0.491619	4	3
A830018L16Rik	0.706318	0.406215	4	3
A830080D01Rik	1.8852	2.92247	6	7
A830082N09Rik	0	0.153893	0	1
A830093I24Rik	0.312883	0.340079	3	2
A930001N09Rik	3.63336	4.52492	3	4
A930003A15Rik	0.608354	0.123207	2	1
A930004D18Rik	0.591707	0.445282	2	2
A930005H10Rik	2.8623	1.21346	3	3
A930005I04Rik	0.343507	0.585063	2	2
A930006I01Rik	0	0.0267987	0	1
A930007I19Rik	0.165556	0.434685	1	2
A930012L18Rik	0.121681	0.536116	1	1
A930013F10Rik	0.380194	1.32917	1	1
A930015D03Rik	1.29413	0.662496	1	1
A930018P22Rik	0.151081	0.0455883	1	1
A930038C07Rik	0.447499	4.40207	2	3
AA387883	0.0532516	0	1	0
AA388235	0.259206	0.118177	1	1
AA415398	0.733204	1.19038	1	1
AA465934	0.653721	0.518044	1	1
AA467197	3.33132	0.663054	2	2
AA474331	1.50864	2.76615	5	6
AA543186	0.237627	0	1	0
AA792892	0	0.0396504	0	1
AA960436	6.9142	7.88001	1	1
AA986860	0.982667	1.53101	2	2
AA987161	1.46249	1.74976	2	2
AB099516	0	0.0427151	0	1
AB124611	0.833061	0.13389	2	1
AF251705	1.7239	0.42477	4	3
AF366264	0	0.0561618	0	1
AF529169	0.21682	0	2	0
AI115009	0.0383025	0	1	0
AI118078	0.350325	0.0384785	3	1
AI182371	0.0796942	0.29593	1	2
AI314180	15.377	17.695	5	5
AI314831	0.0875168	0	1	0
AI314976	15.3466	10.2287	4	4
AI316807	11.2431	12.3425	3	3
AI317395	0.122468	0.212622	1	2
AI413582	14.2004	14.4748	2	2
AI427809	0.139727	0.0693251	1	1
AI428936	1.10686	0.826405	4	4
AI462493	19.6476	15.5171	1	1
AI464131	7.15131	14.9089	2	2
AI467606	1.16141	0.0772895	2	1
AI480653	7.07113	14.9076	3	2
AI504432	5.76272	15.8029	2	2
AI506816	22.3345	13.6077	4	5
AI593442	0.303939	0	1	0
AI597468	11.8249	18.1301	3	3
AI597479	9.62749	6.89236	2	2
AI607873	1.22278	0.613918	2	2
AI646023	3.14511	0.315007	2	2
AI661453	2.3849	1.67526	4	4
AI662270	0.765973	0	3	0
AI747448	4.41544	0.0559428	1	1
AI836003	2.5173	0.318743	1	1
AI837181	29.2935	30.5896	2	2
AI846148	12.8309	10.9275	6	5
AI848100	11.8543	9.22773	6	7
AI848285	0.697733	0.221151	3	3
AI854703	1.24768	0.247132	5	3
AI987944	2.44395	2.34709	2	2
AK010878	6.21965	5.9375	2	2
AK129341	0.900586	0.734538	6	9
AU019823	3.14818	4.82009	2	3
AU021092	2.09583	0.0919536	1	1
AU022252	2.70739	2.81642	3	3
AU022751	0	0.0359355	0	1
AU022754	0.0779002	0	1	0
AU023871	0.0848039	0	1	0
AU040320	6.14196	6.62109	2	2
AU041133	0.466963	0.803546	3	4
AV039307	0.0732858	0.26071	1	2
AV051173	0.296384	0.0255804	1	1
AW046200	0.399443	0.385324	2	2
AW112010	22.7067	13.0109	3	3
AW146020	1.1907	1.79902	1	1
AW146154	0.957955	1.36738	7	4
AW209491	5.29761	2.60663	3	2
AW549877	13.6087	25.1942	4	5
AW551984	13.2346	18.7987	7	7
AW554918	1.31909	1.4168	3	4
AW555464	15.309	9.62715	3	3
AY512931	0	0.0376865	0	1
AY761184	9.5812	0	1	0
Aaas	4.47225	4.58828	3	3
Aacs	6.93796	7.80217	3	4
Aadac	0.602703	0.103112	1	1
Aadat	0.0707133	0	1	0
Aagab	9.56008	7.00106	3	2
Aak1	4.34559	7.28398	7	8
Aamp	53.1895	71.27	3	3
Aanat	0.0372416	0	1	0
Aard	0.178137	0	1	0
Aars	23.4013	25.8793	3	3
Aars2	3.47262	3.9387	4	4
Aarsd1	19.2414	14.8321	1	1
Aasdh	1.94613	2.50887	7	5
Aasdhppt	8.5095	6.51722	5	5
Aass	2.36569	0.819938	2	2
Aatf	5.5624	5.05428	1	1
Aatk	10.5408	3.29668	8	9
Abat	15.2089	9.93891	2	2
Abca1	7.25742	9.73897	3	4
Abca12	0	0.0694304	0	1
Abca2	13.7507	18.1888	5	6
Abca3	11.012	10.9161	4	4
Abca4	2.40487	0.268843	11	3
Abca5	2.49008	3.79971	6	6
Abca6	2.34005	5.96018	5	9
Abca7	13.5089	8.05709	9	9
Abca8a	15.4252	98.9856	8	8
Abca8b	4.8883	14.2532	8	8
Abca9	3.01579	2.51102	3	4
Abcb10	10.2079	16.4572	6	6
Abcb1a	4.62537	0.486127	2	2
Abcb1b	2.49599	0.203405	3	1
Abcb4	0.0624327	0	2	0
Abcb6	4.60554	4.5884	3	3
Abcb7	3.2561	2.74801	1	1
Abcb8	11.0346	8.8952	2	2
Abcb9	5.57732	3.26594	6	4
Abcc1	6.55081	3.49595	2	3
Abcc10	1.66554	5.28862	3	4
Abcc12	0.0253393	0	1	0
Abcc2	2.22977	0.13196	5	2
Abcc3	11.992	88.7266	8	8
Abcc4	5.81048	9.50459	6	3
Abcc5	11.4918	12.7903	7	7
Abcc6	0.604798	0.982493	4	7
Abcc8	2.28462	0.183735	7	3
Abcc9	62.3284	110.953	9	6
Abcd1	13.5334	10.0765	5	3
Abcd2	0.75185	1.34869	2	4
Abcd3	17.0023	19.7626	5	5
Abcd4	4.7586	11.3454	12	11
Abce1	12.0101	14.0456	5	3
Abcf1	19.542	19.7679	1	1
Abcf2	18.8878	15.3306	4	6
Abcf3	9.77661	12.3313	2	2
Abcg1	5.08411	24.1596	1	1
Abcg2	13.0128	16.7958	3	3
Abcg3	0.216478	0.192746	3	3
Abcg4	4.93305	0.928687	8	5
Abcg5	0.979316	0.119713	4	2
Abcg8	0.434905	0	2	0
Abhd1	0.513678	1.82341	1	1
Abhd10	9.5763	5.65574	3	3
Abhd11	14.4667	12.6972	3	3
Abhd12	25.6278	22.5147	1	1
Abhd13	5.51214	6.95565	2	3
Abhd14a	20.329	19.1241	3	3
Abhd14b	25.9248	38.2796	1	1
Abhd15	0.313027	1.69286	1	1
Abhd16a	38.587	43.3913	3	2
Abhd2	16.2421	28.2426	5	3
Abhd3	1.9666	0.992356	3	3
Abhd4	26.5588	38.4704	2	2
Abhd5	6.06852	6.08917	3	3
Abhd6	6.81101	3.36832	5	3
Abhd8	46.8721	26.9741	1	1
Abi1	17.4023	20.2932	5	6
Abi2	6.58247	13.7913	3	3
Abi3	2.35458	0.31621	3	3
Abi3bp	25.4837	101.127	8	8
Abl1	31.3866	35.4962	3	3
Abl2	1.60723	2.98061	4	7
Ablim1	11.1012	14.2538	10	10
Ablim2	13.6325	1.89298	12	7
Ablim3	6.00322	0.544775	11	5
Abp1	1.44206	0.148701	2	3
Abr	12.2571	10.8573	9	10
Abra	0.519195	0.0999927	2	1
Abt1	3.71553	2.87226	3	3
Abtb1	15.5069	16.9091	8	9
Abtb2	3.16245	3.18686	1	1
Acaa1a	47.6123	65.0708	5	5
Acaa1b	4.36941	5.36915	1	1
Acaa2	88.0996	36.8622	1	1
Acaca	6.69354	7.52257	6	7
Acacb	5.84888	2.26331	3	4
Acad10	1.66717	1.61886	3	4
Acad11	6.49508	3.95401	1	1
Acad12	4.24782	2.0542	5	5
Acad8	12.2601	12.8251	6	6
Acad9	7.34143	6.1612	2	2
Acadl	49.3537	25.8287	2	2
Acadm	39.5487	25.3008	3	2
Acads	21.2349	17.1959	3	3
Acadsb	21.3652	29.6709	2	2
Acadvl	57.5707	42.59	1	1
Acap1	0.35848	0.0999032	3	3
Acap2	8.98044	21.1961	3	3
Acap3	7.59016	20.5621	3	3
Acat1	59.1121	38.9335	4	4
Acat2	9.21519	8.33745	2	2
Acat3	1.37033	2.65332	1	1
Acbd3	7.89532	12.345	1	1
Acbd4	15.8224	18.4795	1	1
Acbd5	8.71257	7.14015	7	6
Acbd6	37.9101	21.4662	3	3
Acbd7	0.0834691	0	1	0
Accn1	5.5983	0.529232	3	4
Accn2	0.914447	0.229668	1	1
Accn3	0.0299001	0.0397167	1	1
Accn4	2.17671	0.557251	2	2
Accs	3.26704	4.36699	10	11
Accsl	0.0261811	0	1	0
Acd	16.0306	16.5279	3	3
Ace	4.66005	0.837843	7	6
Ace2	2.03611	0.128978	1	1
Acer1	0.142203	0.0890797	2	2
Acer2	2.16836	0.160271	4	2
Acer3	2.20219	2.21163	2	3
Ache	29.7305	5.1899	2	3
Acin1	22.975	43.84	11	12
Acly	30.2765	35.2324	4	4
Acmsd	0.0277139	0	1	0
Acn9	3.14383	1.91647	2	2
Acnat1	0.126974	0	2	0
Aco1	16.7015	22.0933	4	8
Aco2	118.965	55.0969	2	2
Acot1	2.81882	2.05281	2	2
Acot11	8.82717	6.23003	3	4
Acot12	0.062502	0.0286072	1	1
Acot13	3.22789	2.08536	1	1
Acot2	4.46427	4.97079	2	2
Acot3	0.0458979	0	1	0
Acot4	0.112567	0.0744121	1	2
Acot5	0.47154	0.0316008	2	1
Acot6	2.38794	2.64634	3	2
Acot7	75.1355	77.9712	3	3
Acot8	7.313	5.02802	1	1
Acot9	16.1201	15.7336	3	4
Acox1	19.2144	29.776	5	7
Acox2	0.115482	0	2	0
Acox3	7.72623	9.31704	4	3
Acp1	24.8198	18.5278	7	8
Acp2	9.31397	13.4953	1	1
Acp5	7.4752	2.04748	3	2
Acp6	12.5037	20.0561	4	5
Acpl2	34.8124	15.7698	5	3
Acpp	0.156514	0	2	0
Acr	0.0651451	0.0594507	1	2
Acrbp	1.96441	5.69239	4	4
Acsbg1	0.558008	0.336238	4	3
Acsf2	3.8879	12.9987	3	4
Acsf3	5.93876	5.036	4	4
Acsl1	6.6414	3.42546	3	1
Acsl3	16.3726	11.6286	7	6
Acsl4	6.12329	11.991	3	3
Acsl5	19.3265	19.4149	5	4
Acsl6	7.6834	4.42299	6	4
Acsm3	0.197028	0.0897445	1	1
Acss1	10.6122	4.372	3	5
Acss2	7.59488	7.16318	1	2
Acss3	0.272625	0.159702	3	3
Acta1	2.34287	0.59182	3	1
Acta2	5056.27	678.448	4	4
Actb	1627.27	892.798	1	1
Actc1	0.255541	0.192297	1	2
Actg1	623.581	490.079	1	1
Actg2	3600.47	507.766	1	1
Actl6a	13.2654	9.64018	2	2
Actl6b	3.24311	0.27526	2	2
Actl7a	0	0.0300994	0	1
Actn1	209.396	122.728	7	7
Actn2	6.12807	0.571146	4	3
Actn3	0.682016	0.880693	2	2
Actn4	102.274	81.8922	2	2
Actr10	60.9954	42.3055	8	7
Actr1a	49.4921	35.9706	1	1
Actr1b	43.94	33.4585	5	3
Actr2	31.1803	31.4893	1	1
Actr3	54.7881	52.6343	3	4
Actr3b	2.51887	0.329236	3	3
Actr5	2.60203	4.56893	4	6
Actr6	4.73941	3.44435	1	3
Actr8	12.727	10.5576	3	3
Acvr1	8.5618	13.1188	3	4
Acvr1b	4.08095	5.86529	4	4
Acvr2a	3.73167	5.56644	1	1
Acvr2b	1.08974	3.31926	4	8
Acvrl1	16.0124	47.4959	3	4
Acy1	5.57691	5.36831	4	5
Acy3	1.95303	4.50962	2	3
Acyp1	20.1471	9.09588	2	2
Acyp2	18.9168	7.08186	2	2
Ada	13.3447	2.01822	6	7
Adal	3.2802	4.02765	6	5
Adam10	18.2284	14.0736	2	2
Adam11	14.1084	5.69549	6	4
Adam12	0.246951	0.154461	1	1
Adam15	35.3765	47.7165	2	2
Adam17	1.84081	4.1257	1	1
Adam19	4.98444	32.8343	4	4
Adam1b	0.108514	0.360412	1	1
Adam2	0	0.0273891	0	1
Adam21	0.0411959	0	1	0
Adam22	2.3394	0.188558	7	4
Adam23	10.317	1.45193	3	2
Adam28	0.0296985	0	1	0
Adam30	0	0.0286094	0	1
Adam32	0	0.0356179	0	1
Adam33	25.0984	4.57257	19	12
Adam4	0.116218	0.171025	1	1
Adam5	0.179514	0.0492324	2	1
Adam8	0.335039	0.664379	2	3
Adam9	12.8227	19.501	2	2
Adamdec1	8.17919	5.04809	1	3
Adamts1	5.95557	24.7959	2	3
Adamts10	6.86506	61.0636	12	12
Adamts12	0.837607	2.90434	5	5
Adamts13	0.0273907	0.0256577	1	1
Adamts14	0.449101	3.03864	4	4
Adamts15	2.0247	0.329014	4	3
Adamts17	3.05049	4.61254	3	4
Adamts18	0	2.44064	0	7
Adamts19	0.838282	11.3969	5	7
Adamts2	4.63881	6.45641	3	2
Adamts20	0.217774	0.956502	3	5
Adamts3	0.535923	2.21086	4	5
Adamts4	0.644068	12.5232	1	1
Adamts5	1.7978	0.921561	2	4
Adamts6	0.248758	1.11277	3	10
Adamts7	2.17279	5.76866	7	7
Adamts8	12.1824	2.61164	3	3
Adamts9	1.41641	1.49995	4	2
Adamtsl1	6.31555	1.94623	6	6
Adamtsl2	2.69318	36.1795	4	10
Adamtsl3	9.06867	63.1685	2	4
Adamtsl4	9.99894	6.34109	4	5
Adamtsl5	3.9749	4.44299	11	12
Adap1	13.5963	1.18266	2	2
Adap2	2.6356	11.2065	5	5
Adar	7.64096	9.79415	3	4
Adarb1	1.70876	1.503	7	9
Adarb2	0.0329662	0	1	0
Adat1	0.888204	1.42735	4	8
Adat2	0.765653	0.984424	1	1
Adat3	0.939799	2.57717	1	1
Adc	16.3319	9.93257	9	8
Adck1	5.63049	3.9591	5	5
Adck2	5.94378	8.65595	6	6
Adck3	4.21629	2.16873	1	1
Adck4	6.39541	9.72968	2	2
Adck5	5.4216	10.0053	1	1
Adcy1	2.43819	2.45177	4	2
Adcy10	0	0.0550278	0	1
Adcy2	0.617841	0.676203	2	3
Adcy3	11.1416	9.10795	4	4
Adcy4	3.91329	3.47971	7	9
Adcy5	61.6287	9.98247	7	6
Adcy6	10.925	24.8002	7	9
Adcy7	12.5888	1.86848	5	4
Adcy8	0.0377012	0	1	0
Adcy9	6.13188	4.59333	3	4
Adcyap1	0.982675	0.117633	2	2
Adcyap1r1	30.9001	290.714	6	6
Add1	50.2906	57.3376	2	2
Add2	3.20698	0.227944	4	2
Add3	18.4783	45.6517	4	5
Adh1	12.4565	193.738	2	2
Adh5	45.2108	28.0822	3	3
Adh6a	1.56071	0.12867	1	1
Adh7	0.0447858	0	1	0
Adhfe1	6.27236	6.64217	5	5
Adi1	12.1174	9.68704	1	1
Adig	0.199844	0.0548931	1	1
Adipoq	0.344576	0.12836	1	1
Adipor1	49.1049	39.1269	3	3
Adipor2	18.5907	13.5406	3	4
Adk	58.2846	95.4523	4	4
Adm	4.66535	14.0258	1	1
Adnp	12.1262	16.14	2	3
Adnp2	4.71767	5.96845	4	5
Ado	7.99349	10.3861	1	1
Adora1	5.99428	46.9342	5	5
Adora2a	1.249	0.60847	3	1
Adora2b	0.977775	0.151632	1	1
Adora3	0	0.0402918	0	1
Adpgk	8.74326	8.61522	5	4
Adprh	57.2616	103.218	1	1
Adprhl2	15.0685	24.1231	5	5
Adra1a	2.99306	30.4073	5	7
Adra1b	0.14294	0.804921	1	1
Adra1d	0.239136	0.068175	1	1
Adra2a	2.52098	0	1	0
Adra2b	9.36928	31.538	1	1
Adra2c	0.989811	0.136745	1	1
Adrb3	13.4671	2.36874	5	5
Adrbk1	24.249	19.6994	3	3
Adrbk2	8.3303	5.15987	7	7
Adrm1	54.4452	39.7258	1	1
Adsl	14.0152	13.3867	3	3
Adss	17.4489	14.6028	3	3
Adssl1	1.61362	0.966515	6	4
Aebp1	103.959	74.4613	3	3
Aebp2	5.07896	7.86864	3	4
Aen	9.41322	10.4337	4	4
Aes	481.837	190.921	2	2
Afap1	3.15987	10.2243	3	2
Afap1l1	5.1623	0.604969	5	3
Afap1l2	8.15405	25.1588	4	6
Aff1	8.85018	9.02726	3	4
Aff2	0.393401	0.0542139	3	2
Aff3	1.54484	1.63755	4	7
Aff4	12.0515	19.1721	4	5
Afg3l1	14.5539	11.0196	7	7
Afg3l2	16.343	15.4158	1	1
Afmid	2.04089	1.72903	1	1
Aftph	13.7313	11.7708	3	3
Aga	14.1985	20.1805	3	3
Agap1	8.30588	4.17961	6	5
Agap2	4.51622	1.83808	6	4
Agap3	32.3413	33.1608	8	7
Agbl1	0	0.0273671	0	1
Agbl2	0.732189	0.776999	5	6
Agbl3	2.13018	1.87405	5	3
Agbl4	0.523289	0	4	0
Agbl5	3.44796	7.45397	4	4
Ager	0.605763	4.90191	2	4
Agfg1	11.0975	11.2814	5	5
Agfg2	14.7205	13.2352	7	7
Aggf1	9.48543	13.6033	2	3
Agk	7.10216	8.16421	1	1
Agl	22.4322	13.1096	7	7
Agmat	0.107357	0	1	0
Agmo	5.0596	1.11985	6	5
Agpat1	34.0184	28.1879	2	2
Agpat2	9.3744	11.9239	5	6
Agpat3	29.3239	24.7839	4	4
Agpat4	15.9353	27.2537	1	1
Agpat5	11.0887	7.83028	4	4
Agpat6	23.3763	103.094	2	2
Agpat9	5.6331	8.37541	2	2
Agphd1	0.960474	1.07527	2	4
Agps	3.41475	4.91961	2	3
Agr2	17.8573	1.48556	4	2
Agrn	16.6843	28.1596	3	4
Agrp	1.14641	0.167889	2	1
Agt	1.83174	0.488381	3	2
Agtpbp1	14.939	9.29644	4	4
Agtr1a	10.267	2.35065	1	1
Agtr1b	0.112771	0.66983	1	1
Agtr2	0.0854598	2.39964	1	2
Agtrap	9.21953	12.2547	2	2
Agxt2	0	0.0259317	0	1
Agxt2l2	2.83522	2.96268	1	1
Ahctf1	6.10197	8.8176	4	3
Ahcy	32.51	16.1418	6	6
Ahcyl1	27.8331	31.9921	2	2
Ahcyl2	7.58625	5.16468	3	3
Ahdc1	6.98784	13.9275	6	9
Ahi1	15.7331	8.18424	2	2
Ahnak	30.469	33.5883	3	3
Ahr	2.01596	0.226307	4	2
Ahrr	0.20137	0	1	0
Ahsa1	67.9751	36.9769	1	1
Ahsa2	7.77536	8.11234	1	1
Ahsg	0.196053	0	2	0
Aif1	3.913	1.04422	4	3
Aif1l	1.46528	4.71443	3	3
Aifm1	9.09126	8.64884	1	2
Aifm2	5.95909	5.27198	4	5
Aifm3	0.410967	0.338141	3	4
Aig1	14.5582	10.2471	2	2
Aim1	1.02649	0.135868	4	2
Aim1l	0.202782	0	1	0
Aim2	0.268249	0.143047	2	2
Aimp1	36.3034	18.4113	2	1
Aimp2	14.9304	8.3914	2	2
Aip	55.2578	45.2986	3	4
Aipl1	0.0358083	0.0384941	1	1
Aire	0.0507213	0.118265	1	2
Airn	4.02301	8.7328	4	4
Ajap1	1.48709	0.175011	2	1
Ak1	30.1988	3.37582	4	3
Ak2	29.5862	18.4933	2	2
Ak3	6.47436	6.95312	1	1
Ak4	3.68412	2.31931	5	4
Ak5	0.647212	0.654589	2	2
Ak7	0.0550169	0	1	0
Ak8	0.13921	0.12045	2	1
Akap1	24.1842	6.81721	5	4
Akap10	2.68809	3.63855	3	3
Akap11	9.4458	11.8301	7	8
Akap12	24.5298	56.0292	2	2
Akap13	6.25585	12.7621	7	12
Akap17b	1.39261	1.26557	2	5
Akap2	17.3119	40.2766	3	2
Akap5	0.393296	0.440154	2	2
Akap6	3.55892	0.624396	1	2
Akap7	8.74883	9.8723	11	8
Akap8	9.28998	27.0026	9	9
Akap8l	9.28047	16.9485	1	1
Akap9	2.29175	5.13773	3	6
Akirin1	24.349	13.2455	2	1
Akirin2	28.351	35.7461	1	1
Akna	1.70776	8.16539	4	6
Aknad1	0.559253	4.03628	7	6
Akp3	0.366171	0	1	0
Akr1a4	243.3	188.062	2	2
Akr1b10	19.7014	6.24884	2	2
Akr1b3	45.6985	27.3419	1	1
Akr1b7	0.305514	0.0780759	1	1
Akr1b8	5.03031	9.57705	1	1
Akr1c12	0.80574	0.213238	1	1
Akr1c13	1.81942	0.230189	2	2
Akr1c14	0.999196	0.23838	3	1
Akr1c19	0.143425	0.112983	1	1
Akr1c21	0.0332054	0.0424617	1	1
Akr1e1	11.402	5.41707	1	1
Akr7a5	22.0407	17.0642	2	2
Akt1	76.613	97.1209	6	5
Akt1s1	48.8141	27.8031	1	1
Akt2	40.9456	52.2408	2	2
Akt3	8.79506	8.59418	3	3
Aktip	21.8171	9.73348	3	3
Alad	22.4593	15.1134	3	3
Alas1	16.9449	17.9965	5	5
Alas2	0.560198	0.671566	3	4
Alb	0.0604647	0	1	0
Alcam	15.4956	2.95141	3	3
Aldh16a1	7.0756	6.88839	1	1
Aldh18a1	9.7115	17.9836	3	3
Aldh1a1	99.9065	55.6374	1	1
Aldh1a2	44.5098	6.54259	1	1
Aldh1a3	35.7787	69.0304	2	3
Aldh1a7	0.640109	0.0550384	1	1
Aldh1b1	46.9954	3.54578	2	2
Aldh1l1	4.50797	0.345477	6	3
Aldh1l2	0.618986	1.42449	3	4
Aldh2	202.172	237.661	3	2
Aldh3a1	0.793717	0.383391	2	3
Aldh3a2	21.2092	25.1741	2	2
Aldh3b1	4.59136	1.59467	3	4
Aldh3b2	0.0346093	0.0309139	1	1
Aldh4a1	14.3762	8.12755	1	1
Aldh5a1	4.11738	1.96741	2	1
Aldh6a1	20.8391	11.5541	4	4
Aldh7a1	34.7262	23.3842	4	4
Aldh9a1	22.5444	34.0028	3	4
Aldoa	898.557	401.398	5	4
Aldob	8.14503	0.418396	2	1
Aldoc	11.3666	1.22855	3	2
Alg1	14.5905	17.1765	1	1
Alg10b	5.43343	9.64365	1	2
Alg11	3.15276	3.58567	4	3
Alg12	4.52097	6.33697	8	6
Alg13	1.65635	3.28737	6	10
Alg14	7.7849	7.22045	2	2
Alg2	15.227	13.6417	2	2
Alg3	10.8216	9.74711	1	1
Alg5	11.7869	11.8868	2	2
Alg6	2.1601	5.64264	5	7
Alg8	3.18278	4.30137	4	6
Alg9	5.93128	5.66004	2	2
Alk	2.49922	0.155558	5	2
Alkbh1	2.16522	3.46333	1	1
Alkbh2	3.55035	8.09487	6	7
Alkbh3	12.2187	10.2744	5	5
Alkbh4	2.46873	2.43839	5	6
Alkbh5	14.9068	16.8759	2	3
Alkbh6	21.4533	18.7004	4	4
Alkbh7	12.3474	8.75283	2	2
Alkbh8	1.46023	1.87923	4	5
Allc	0	0.0305237	0	1
Alms1	1.19991	2.04435	6	10
Alms1-ps2	0.621544	0.701087	2	2
Alox12	0.167815	0.251446	1	2
Alox12b	0.0311993	0	1	0
Alox12e	0.0258038	0	1	0
Alox15	0.143162	0.0593982	1	1
Alox5	0.498259	0.131247	3	2
Alox5ap	6.55248	1.23428	5	2
Alox8	0.0677802	0	1	0
Aloxe3	0.12618	0.525347	2	6
Alpi	2.58038	0.078088	4	2
Alpk1	1.5204	4.73101	6	10
Alpk2	0.585139	0	4	0
Alpk3	0.444102	2.27812	4	7
Alpl	2.36936	0.348646	1	2
Als2	1.80836	2.38589	3	4
Als2cl	1.38817	2.09012	10	10
Als2cr12	0.102835	0	2	0
Als2cr4	9.57863	6.32657	3	3
Alx4	0.0410384	0	1	0
Amac1	0	0.04665	0	1
Amacr	6.58261	4.69726	4	5
Ambra1	8.7562	12.9612	6	7
Amd1	23.6982	12.5461	1	1
Amdhd1	0	0.0580018	0	1
Amdhd2	9.21924	9.73333	3	3
Amelx	0	0.160935	0	1
Amfr	60.4475	56.5374	5	6
Amh	0.187478	0.162655	2	1
Amhr2	1.33076	3.23896	2	5
Amica1	0.282728	0	3	0
Amigo1	12.8839	8.92064	2	2
Amigo2	9.2028	1.54787	3	2
Amigo3	0.877082	2.18191	1	1
Ammecr1	0.388968	0.667853	1	1
Ammecr1l	7.52436	10.9958	4	4
Amn	1.03325	0.760393	2	2
Amn1	3.94387	2.8277	5	5
Amot	1.48537	2.42171	4	5
Amotl1	9.54285	24.1854	4	4
Amotl2	17.6843	28.5543	2	2
Ampd2	14.7529	44.3105	11	11
Ampd3	8.62474	4.00001	6	5
Amph	5.95467	0.987131	5	3
Amt	1.17442	1.75617	1	1
Amy1	0	0.572486	0	1
Amy2a3	0.332481	0	1	0
Amy2a4	0.663515	0	2	0
Amy2a5	0.673207	0	1	0
Amy2b	0.0553466	0	1	0
Amz1	1.0242	5.79364	8	11
Amz2	15.0185	16.1582	7	6
Anapc1	12.3613	16.5398	4	5
Anapc10	3.06618	2.27417	2	2
Anapc11	13.8613	11.4891	2	2
Anapc13	75.1634	39.4326	1	1
Anapc16	29.9372	21.1982	3	3
Anapc2	32.1018	32.5799	2	2
Anapc4	15.4427	19.8151	1	2
Anapc5	81.1775	107.541	6	8
Anapc7	25.8481	52.2122	2	2
Ang	11.3335	14.4736	2	2
Ang4	6.32207	0.570185	1	1
Angel1	1.47292	1.5646	4	5
Angel2	10.3281	11.7275	6	7
Angpt1	0.81439	1.2523	5	3
Angpt2	1.79448	0.445541	4	3
Angpt4	0.317246	0.113318	2	2
Angptl1	12.9441	3.63323	3	2
Angptl2	212.813	729.727	1	1
Angptl4	10.0808	7.06374	1	1
Angptl6	9.37172	1.41552	3	4
Angptl7	2.64962	2.61405	3	5
Ank	21.0912	8.50037	3	3
Ank1	30.6735	68.2826	9	12
Ank2	11.0754	36.8754	7	8
Ank3	13.7334	9.17813	9	11
Ankdd1b	0.0507779	0	1	0
Ankfy1	7.78499	9.91758	3	3
Ankhd1	6.79343	12.8886	4	7
Ankib1	4.4433	5.14722	5	5
Ankle1	0.0875839	0.0945166	1	1
Ankle2	6.35419	7.53455	4	4
Ankmy1	0.0377539	0.0274149	1	1
Ankmy2	13.147	9.77324	2	2
Ankra2	7.95921	6.84434	4	5
Ankrd1	0.807506	0.217397	1	3
Ankrd10	21.4989	25.5973	8	11
Ankrd11	25.1738	35.0425	8	8
Ankrd12	3.08046	6.12614	5	4
Ankrd13a	18.1943	17.0553	2	2
Ankrd13b	7.34115	6.42051	7	7
Ankrd13c	7.36603	7.24166	2	2
Ankrd13d	4.06785	2.34617	4	4
Ankrd16	4.682	9.83088	8	10
Ankrd17	6.03981	9.32211	5	8
Ankrd2	0.155799	0.0336523	2	1
Ankrd22	0.0263342	0.194653	1	2
Ankrd23	3.93135	4.46749	7	8
Ankrd24	3.06558	2.92113	9	10
Ankrd26	1.41221	2.53693	7	6
Ankrd27	7.37484	8.5356	2	2
Ankrd28	6.93064	4.96046	6	7
Ankrd29	1.37626	0.12031	3	1
Ankrd32	1.53765	2.46421	2	5
Ankrd33b	0.100993	0.0318158	2	1
Ankrd34a	2.13382	0.602225	1	1
Ankrd34b	0.282945	0	1	0
Ankrd35	1.78144	9.1617	4	6
Ankrd37	3.27872	1.44875	1	1
Ankrd40	36.4147	26.9666	2	2
Ankrd42	1.58059	0.694123	4	7
Ankrd43	0.147357	0.0297893	1	1
Ankrd44	2.32314	2.39473	3	3
Ankrd45	0.799327	0.0865329	3	1
Ankrd46	31.1142	34.0947	3	3
Ankrd49	3.7907	2.3224	4	3
Ankrd5	0	0.05427	0	1
Ankrd50	10.0092	30.843	7	7
Ankrd52	6.99029	11.5111	4	4
Ankrd53	0.0450683	0.310018	1	2
Ankrd54	10.0212	12.1648	4	4
Ankrd55	0.107132	0.0290232	2	1
Ankrd56	0.345018	0.0902148	1	1
Ankrd57	1.99156	2.96382	1	1
Ankrd58	0.0695297	0	1	0
Ankrd6	3.74395	1.74564	7	5
Ankrd61	0.10675	0.181755	1	1
Ankrd9	7.82838	3.66322	4	4
Anks1	21.8633	60.6172	7	7
Anks1b	0.776785	0.0253079	6	1
Anks3	7.92203	14.9331	1	1
Anks4b	0.170931	0.0320442	1	1
Anks6	3.12552	4.03646	7	7
Ankzf1	5.40587	7.16398	1	1
Anln	6.69266	1.09266	8	4
Ano1	47.5358	6.67103	10	7
Ano10	31.2162	25.8117	3	3
Ano2	3.29172	0.241069	4	3
Ano3	0.0985557	0	2	0
Ano4	0.414181	1.38244	1	4
Ano5	0.671214	0.164248	5	3
Ano6	28.6342	43.4591	4	4
Ano7	0.301061	0.0589872	4	1
Ano8	7.6359	9.91755	3	3
Ano9	1.66434	0.0393664	6	1
Anp32a	39.9359	30.7351	5	4
Anp32b	42.04	42.5276	2	2
Anp32e	23.7508	19.6552	2	2
Anpep	13.9319	14.5625	3	5
Antxr1	27.5322	50.1085	3	3
Antxr2	35.8691	21.6254	4	5
Antxrl	0.105946	0	1	0
Anubl1	0.279257	0.231548	1	2
Anxa1	56.1584	29.7368	1	1
Anxa10	0.0787023	0.0267088	1	1
Anxa11	56.6279	30.3124	2	2
Anxa13	1.38911	0	3	0
Anxa2	114.614	27.2927	1	1
Anxa3	18.075	3.55456	2	1
Anxa4	17.8402	16.1059	2	2
Anxa5	131.723	273.033	1	2
Anxa6	239.024	242.966	6	6
Anxa7	26.5654	36.9155	3	4
Anxa8	10.5091	1.00351	2	1
Anxa9	4.58676	1.55152	2	1
Aoah	0.529047	0.0953796	2	1
Aoc2	0.11206	0.0832402	1	1
Aoc3	63.9196	39.1055	2	2
Aox1	1.64346	6.11552	8	12
Aox3	0.29384	0.748784	4	3
Aox3l1	0	0.0550257	0	1
Ap1ar	9.56328	10.8151	4	5
Ap1b1	15.7994	15.4317	4	3
Ap1g1	9.22963	13.6304	5	4
Ap1g2	4.7855	3.71234	3	3
Ap1m1	36.8418	24.4554	4	3
Ap1m2	0.894707	0.0897258	2	1
Ap1s1	41.9274	31.232	2	1
Ap1s2	22.1102	8.16028	3	3
Ap1s3	2.97938	4.26351	2	2
Ap2a1	28.5746	29.4543	2	2
Ap2a2	18.6613	20.5805	3	3
Ap2b1	17.7992	21.7179	3	2
Ap2m1	135.498	105.322	2	2
Ap2s1	65.8251	55.568	1	1
Ap3b1	9.53158	10.0791	2	2
Ap3b2	6.92915	1.11707	5	6
Ap3d1	31.1706	40.1022	4	5
Ap3m1	1.80612	3.14073	1	1
Ap3m2	6.18006	4.49109	4	4
Ap3s1	16.6537	20.5509	2	3
Ap3s2	11.0463	6.36267	2	2
Ap4b1	4.42905	5.59726	4	4
Ap4e1	3.23178	4.21237	5	8
Ap4m1	3.97392	7.27261	1	1
Ap4s1	23.8663	11.7941	2	2
Apaf1	1.63764	4.34921	5	6
Apba1	4.61204	3.66174	4	5
Apba2	4.68586	0.817227	4	4
Apba3	18.6115	16.9809	2	2
Apbb1	36.6797	10.1894	4	3
Apbb1ip	2.58353	15.3455	1	3
Apbb2	3.90023	1.57005	6	6
Apbb3	6.73013	9.04773	1	1
Apc	1.50439	3.8735	5	6
Apc2	2.73977	1.23358	3	3
Apcdd1	2.43165	2.96047	2	3
Apeh	17.8007	18.6531	2	2
Apex1	8.20851	6.60335	2	2
Apex2	1.93594	2.62222	2	2
Aph1a	52.0201	50.6999	3	3
Aph1b	2.74455	2.88037	2	3
Aph1c	2.21512	2.63523	3	2
Api5	24.446	21.6003	3	3
Apip	13.9443	9.0599	4	3
Apitd1	0.32478	0.265195	2	2
Aplf	1.51602	1.77892	2	2
Apln	5.90474	0.267946	2	1
Aplnr	3.42835	1.27163	1	1
Aplp1	43.9733	25.5075	1	1
Aplp2	162.79	138.637	3	3
Apoa1	49.3005	1.9433	1	1
Apoa1bp	47.5115	51.9041	2	2
Apoa2	0.873663	0.612173	1	1
Apoa4	54.384	3.48394	2	1
Apob	0.991669	0	2	0
Apobec1	3.12004	1.20402	5	4
Apobec2	2.97876	0.83406	1	1
Apobec3	2.85284	2.53589	4	4
Apobr	0.279662	0.166876	2	2
Apoc1	0.83893	0.407656	3	2
Apoc2	10.0001	0.698087	2	2
Apoc3	8.22911	0.449559	1	1
Apod	38.8706	5.67685	3	4
Apoe	573.571	92.6541	3	3
Apoh	0.0756994	0.0604179	1	1
Apol10a	1.1892	0.0786631	1	1
Apol10b	0.887188	0.455702	1	1
Apol11b	0	0.0653347	0	1
Apol6	0.599979	0.292563	2	2
Apol7a	1.09205	0.0340293	5	1
Apol7b	0.108812	0	1	0
Apol7c	0.292451	0	1	0
Apol7d	0.0279989	0.102705	1	1
Apol7e	0.276437	0	1	0
Apol8	0.252029	0.212819	2	3
Apol9a	2.98294	0.741456	3	3
Apol9b	2.75506	0.881355	4	3
Apold1	0.743423	0.285187	1	1
Apom	0.0399225	0.0926635	1	2
Apoo	20.8402	6.49902	3	3
Apool	12.9171	5.12423	3	3
App	297.968	846.269	7	7
Appbp2	5.39093	7.6535	2	4
Appl1	6.92733	10.456	1	1
Appl2	10.5373	22.1062	9	11
Aprt	62.046	57.1747	1	1
Aptx	4.54115	4.24045	3	3
Aqp1	86.7464	6.33743	4	2
Aqp11	0.399231	0.195671	1	1
Aqp3	0.115777	0	1	0
Aqp4	0.538185	0.148005	1	1
Aqp5	0.0957209	0	1	0
Aqp7	1.40343	0.136103	5	3
Aqp8	0.200003	0.132455	1	1
Aqr	6.15787	8.07465	3	3
Ar	0.780958	1.60408	1	1
Araf	35.5883	43.3552	6	6
Arap1	10.8202	29.5902	5	4
Arap2	4.14107	10.2471	6	5
Arap3	3.3382	0.886934	10	8
Arc	0.699143	1.42681	2	2
Arcn1	36.9222	58.0911	5	5
Areg	0.122048	0.0383636	1	1
Arf1	192.956	178.351	2	3
Arf2	19.906	17.4748	3	3
Arf3	36.7124	58.0041	2	2
Arf4	96.8119	129.808	2	2
Arf5	70.1107	79.9167	4	4
Arf6	14.8538	17.4449	1	1
Arfgap1	13.4638	24.059	7	5
Arfgap2	22.908	27.2264	2	2
Arfgap3	10.8645	18.1552	4	4
Arfgef1	8.71883	10.2903	4	4
Arfgef2	4.69405	6.76954	1	1
Arfip1	16.5031	26.6001	5	5
Arfip2	11.9519	19.0135	4	4
Arfrp1	9.44028	11.2314	4	4
Arg1	0.220968	0.165973	1	3
Arg2	0.863441	0.117739	1	1
Arglu1	32.7393	57.2225	4	4
Arhgap1	33.1681	40.3873	7	7
Arhgap10	10.8981	10.3915	3	3
Arhgap11a	0.441485	0.288875	3	2
Arhgap12	6.94739	10.6535	8	8
Arhgap15	2.01085	0.1844	2	1
Arhgap17	7.19211	9.3238	9	8
Arhgap18	6.22908	0.918604	3	4
Arhgap19	1.1288	0.589216	2	3
Arhgap20	1.96263	0.10136	2	1
Arhgap21	7.51072	11.5618	5	4
Arhgap22	6.78386	3.2056	9	7
Arhgap23	10.3273	17.5711	3	3
Arhgap24	10.4299	3.32124	6	4
Arhgap25	0.799559	0.407747	6	4
Arhgap26	3.20363	0.837877	3	4
Arhgap27	2.57474	5.4172	7	8
Arhgap28	3.57701	7.33906	3	4
Arhgap29	16.6864	19.5879	5	7
Arhgap30	0.686106	0.216304	4	2
Arhgap31	4.99048	6.06003	4	4
Arhgap32	2.32412	5.14832	7	9
Arhgap33	2.0076	6.53454	10	9
Arhgap36	0.0621029	0.0327143	1	1
Arhgap39	4.18723	5.61415	5	5
Arhgap4	1.32367	0.534297	2	2
Arhgap42	6.1126	4.71991	7	5
Arhgap44	7.07223	1.54439	2	3
Arhgap5	9.23414	13.3912	6	6
Arhgap6	7.76253	5.05694	2	2
Arhgap8	0.829147	2.35861	3	8
Arhgap9	1.18393	0.443366	2	2
Arhgdia	153.61	156.781	5	6
Arhgdib	15.9377	9.75153	4	4
Arhgdig	7.74419	0.915958	1	1
Arhgef1	25.5636	63.4659	11	13
Arhgef10	7.58684	9.61945	4	4
Arhgef10l	7.40763	7.42858	6	7
Arhgef11	9.90262	15.8965	4	4
Arhgef12	15.0235	28.6081	8	12
Arhgef15	5.82877	2.19223	7	8
Arhgef16	1.90281	0.194936	3	1
Arhgef17	13.5516	20.4357	6	5
Arhgef18	11.1762	8.28154	3	2
Arhgef19	5.26918	13.0135	6	5
Arhgef2	9.24893	30.9393	8	7
Arhgef25	63.9652	62.6547	11	14
Arhgef26	16.4128	11.5054	4	4
Arhgef3	13.8696	4.8299	6	7
Arhgef33	0.125426	0.0871981	2	2
Arhgef37	0.746535	0.0537984	6	1
Arhgef4	2.37915	1.30696	1	1
Arhgef40	17.7011	59.5573	6	5
Arhgef5	15.7492	11.9967	3	3
Arhgef6	4.64065	16.8008	6	6
Arhgef7	12.2791	11.2556	4	3
Arhgef9	7.74593	4.17279	9	10
Arid1a	14.0787	30.4481	5	7
Arid1b	7.28121	14.9211	6	9
Arid2	8.85026	10.6037	3	4
Arid3a	1.26928	2.09194	5	4
Arid3b	0.605294	0.708202	4	6
Arid4a	3.43387	6.43723	5	5
Arid4b	4.12527	6.06872	6	5
Arid5a	1.37835	0.644308	4	5
Arid5b	6.80028	5.1912	7	6
Arih1	12.9953	15.446	5	5
Arih2	8.66465	12.695	5	5
Arl1	56.3293	112.932	3	3
Arl10	5.639	3.88604	1	1
Arl11	0.585992	0	1	0
Arl13b	3.55664	5.0253	3	2
Arl15	2.56946	3.33896	1	3
Arl16	3.67418	3.12075	2	2
Arl2	61.2818	33.7372	2	2
Arl2bp	52.9727	31.7067	2	2
Arl3	62.8679	32.5567	2	2
Arl4a	19.54	7.0888	4	3
[truncated: 14,741 more rows]
