# Supplementary material for: Transcriptome analysis of PDGFRα+ cells identifies T-type Ca2+ channel CACNA1G as a new pathological marker for PDGFRα+ cell hyperplasia
Source: PLoS One. 2017 Aug 14;12(8):e0182265. doi: 10.1371/journal.pone.0182265 (PMC5555714; doi:10.1371/journal.pone.0182265)
Supplement: S7 Table — (XLSX) [file pone.0182265.s015.xlsx]

## Sheet: Transcription factor
S7 Table. List of transcription factors expressed in jejunal and colonic PDGFRα+ cells.
Gene	Expression (FPKM)		Specificity [PaC/{SMC+ICC}]
ID	JPαC	CPαC	JPαC	CPαC	PαC
Tceb2	267.132	158.401	0.677017	0.516781	0.596899
Ctnnb1	136.66	120.981	0.360229	0.324767	0.342498
Dazap2	118.418	73.5106	0.578789	0.443136	0.510962
Sub1	89.0461	75.7503	0.681946	0.557696	0.619821
Atf4	77.0373	93.0292	0.404313	0.471419	0.437866
Ctbp1	76.2757	97.6119	0.552309	0.626048	0.589178
Sap18	58.2105	45.58	0.520348	0.475548	0.497948
Jun	53.0356	110.734	0.252803	0.811564	0.532183
Cops5	52.2454	26.8436	0.66897	0.383813	0.526392
Fos	51.1385	140.77	0.0919012	0.362524	0.227212
Atf5	50.4696	125.391	0.289166	0.716033	0.5026
Ldb1	49.0183	72.1249	0.417771	0.67315	0.54546
Lmo4	43.182	14.8941	0.419058	0.316149	0.367603
Cdk4	43.0352	52.1722	0.537746	0.569376	0.553561
Snf8	36.2829	23.4181	0.669503	0.524974	0.597239
Ski	35.1463	63.3643	0.368997	0.441335	0.405166
Yap1	34.5012	25.14	0.568081	0.348402	0.458241
Meis1	33.0437	43.3463	0.396907	0.476408	0.436657
Hdac1	31.5105	33.7333	0.512934	0.473325	0.49313
Creg1	31.1463	35.7665	1.57935	1.81419	1.69677
Wwtr1	31.1281	43.0849	0.38092	0.426561	0.40374
Pbx3	31.0037	56.3205	0.515233	0.573977	0.544605
Tead3	30.8206	25.8186	0.418474	0.289742	0.354108
Hax1	29.1628	25.261	0.520219	0.506611	0.513415
Hdac2	27.4153	23.5153	0.426427	0.348778	0.387602
Pbx1	26.2957	32.4642	0.362639	0.539256	0.450947
Sra1	25.5337	31.0123	0.753802	0.787438	0.77062
Usf1	24.761	32.0702	0.567088	0.680877	0.623982
Tbl1x	24.7071	19.4353	0.388241	0.322749	0.355495
Pdlim1	24.4689	18.0175	2.25463	0.703844	1.47924
Trp53	22.322	41.2298	0.336644	0.595359	0.466001
Rela	21.6477	24.8454	0.580241	0.583427	0.581834
Mta2	20.1766	29.3713	0.428193	0.573788	0.50099
Nr4a1	19.6822	38.4149	0.0755652	0.268795	0.17218
Tle1	18.8728	16.5366	0.367739	0.526	0.446869
Nfyc	17.9888	19.6661	0.313239	0.527918	0.420578
Tcf12	17.4043	35.2326	0.328642	0.657728	0.493185
Tcf7l1	16.4818	25.0836	0.3743	0.62643	0.500365
Tfdp1	15.9447	22.604	0.393759	0.504128	0.448944
Ecsit	15.8151	7.42906	0.489915	0.2936	0.391758
Tcf3	15.491	26.2106	0.401459	0.654305	0.527882
Kat5	15.2472	14.3666	0.549402	0.481536	0.515469
Pbx2	14.6689	23.5975	0.49663	0.749703	0.623166
Nfatc4	14.6302	15.8059	0.276787	0.294967	0.285877
Parp1	13.9781	8.28106	0.408133	0.270691	0.339412
E2f6	13.676	8.66482	0.461637	0.425728	0.443683
Hes6	13.6012	15.2531	0.479072	0.63271	0.555891
Foxf2	13.4387	2.8866	0.233152	0.0829217	0.158037
Yy1	13.2821	14.0657	0.470035	0.457452	0.463744
Ascc1	13.2336	8.10493	0.719451	0.511314	0.615383
Smad4	13.2235	14.1339	0.284088	0.346133	0.31511
Ldb2	13.183	10.7671	0.529534	0.256718	0.393126
Tead2	13.0711	23.7148	0.331989	0.869552	0.60077
Med27	13.0362	11.5983	0.490984	0.399422	0.445203
Kdm1a	12.6626	15.1859	0.449231	0.468269	0.45875
Zeb1	12.6522	18.156	0.365383	0.452319	0.408851
Epas1	12.4115	25.4842	1.13288	1.70392	1.4184
Naa15	12.3532	11.0288	0.358606	0.366946	0.362776
E2f4	12.26	16.8033	0.410064	0.562964	0.486514
Hif1a	12.2267	17.7549	0.314449	0.299279	0.306864
Tbx3	12.1742	1.3957	0.915918	0.123218	0.519568
Tead1	12.0678	11.6907	0.246621	0.201206	0.223913
Smad5	11.5686	32.8985	0.319254	0.758185	0.538719
Tcf4	11.0559	23.6842	0.413177	0.440286	0.426732
Rarg	10.6942	21.5573	0.685064	0.880575	0.78282
Rbpj	10.2246	14.2802	0.405268	0.48017	0.442719
Smad1	10.1791	16.2308	0.627199	0.529579	0.578389
Ncor1	9.97531	16.9581	0.266356	0.423236	0.344796
Atf1	9.85482	16.3528	0.393618	0.565634	0.479626
Glis2	9.67188	27.7245	0.257046	0.868317	0.562682
Med7	9.63709	10.4181	0.43513	0.502648	0.468889
Hand2	9.60856	2.55709	0.46704	0.165092	0.316066
Ep300	9.49348	14.0614	0.324196	0.427719	0.375957
Smad6	9.47152	4.33573	0.346934	0.418249	0.382592
Deaf1	9.41066	14.5472	0.320859	0.570477	0.445668
Rbm14	9.13992	10.357	0.382785	0.420128	0.401457
Tfdp2	9.05985	10.353	0.427963	0.491995	0.459979
Arid2	8.85026	10.6037	0.345613	0.389765	0.367689
Rbl2	8.53946	8.26313	0.504396	0.495247	0.499821
Ets1	8.35256	36.4222	0.713592	2.95763	1.83561
Med17	8.32837	11.1334	0.400674	0.531058	0.465866
Apex1	8.20851	6.60335	0.493136	0.457163	0.475149
Arnt	8.19513	20.1008	0.293989	0.57686	0.435424
Klf4	7.74306	8.73344	0.592027	0.847717	0.719872
Nfyb	7.63982	6.93794	0.467817	0.407367	0.437592
Nrbf2	7.50519	8.75509	0.604291	0.713902	0.659096
Xrcc6	7.26896	5.81704	0.401133	0.432271	0.416702
Sin3a	7.2187	9.35978	0.341072	0.438708	0.38989
Smad2	7.0886	8.89637	0.471984	0.503911	0.487948
Nrf1	6.73473	10.2319	0.363754	0.578282	0.471018
Atf7ip	6.72454	10.5451	0.325489	0.412612	0.36905
Smad3	6.58863	24.4292	0.4551	1.11535	0.785225
Taf1b	6.31033	4.7185	0.487138	0.368149	0.427644
Lpin1	6.2329	7.45693	0.488938	0.674405	0.581672
Crem	6.16579	5.4575	0.642338	0.360791	0.501564
Tbx2	5.9966	1.16293	2.37612	0.582982	1.47955
Smad9	5.96432	0.373196	0.263611	0.165037	0.214324
Heyl	5.87192	47.9938	3.29118	18.9415	11.1163
Tbp	5.79506	7.98727	0.438313	0.544737	0.491525
Rb1	5.75022	4.07874	0.31312	0.254197	0.283659
Tfam	5.65969	6.58173	0.557804	0.635695	0.59675
Hivep2	5.58006	9.7887	0.255748	0.426737	0.341242
Arntl	5.49615	11.2044	0.32601	0.525074	0.425542
Cdk2	5.27691	13.5551	0.230337	0.586301	0.408319
Pknox1	5.2008	10.8101	0.532005	0.633589	0.582797
Pus1	5.20046	5.57012	0.365911	0.488544	0.427228
Ncoa6	5.05683	8.03807	0.287111	0.405458	0.346285
Mina	4.85251	3.51712	0.445423	0.419086	0.432254
Tcf7l2	4.51158	6.56686	0.21557	0.647147	0.431358
Med23	4.27269	6.59928	0.295741	0.450911	0.373326
Zfpm1	4.08978	7.89738	0.942169	3.70956	2.32587
Prkdc	4.04003	3.71148	0.457655	0.30417	0.380912
Nfatc1	4.02269	8.64546	0.473319	0.652666	0.562992
Creb1	3.99491	4.72505	0.366174	0.398926	0.38255
Dcp1a	3.94486	5.81971	0.296802	0.412879	0.354841
Trrap	3.89889	10.5235	0.240294	0.567878	0.404086
Eya3	3.69589	5.03546	0.444113	0.531128	0.48762
Hey2	3.67134	0.708917	2.15836	0.450873	1.30462
Smad7	3.53943	6.36929	0.228918	0.466435	0.347677
Taf1c	3.51897	5.64649	0.450658	0.677859	0.564259
E2f5	3.40121	3.62871	0.301721	0.360757	0.331239
Lmo2	3.35458	1.61573	0.508109	0.267495	0.387802
Pitx2	3.33741	0	0.509998	0	0.254999
Clock	3.29257	5.76008	0.239216	0.405563	0.32239
Mga	3.0659	8.14041	0.246825	0.580039	0.413432
Tcf7	2.81542	2.15236	0.219299	0.274362	0.246831
Crebbp	2.38693	7.83069	0.143187	0.382683	0.262935
Zfhx3	2.0891	7.78247	0.109304	0.288329	0.198817
Mafb	1.82641	2.83476	1.21448	0.692101	0.95329
E2f3	1.48953	2.10755	0.267149	0.348139	0.307644
Rbl1	1.4232	2.0447	0.240376	0.284942	0.262659
E2f1	1.21898	0.229387	0.288724	0.0546721	0.171698
Npas2	1.19734	3.19807	0.351093	0.259948	0.30552
Foxm1	0.571812	1.03065	0.138808	0.193195	0.166002
